# Supplementary material for: Characterizing excited-state intramolecular proton transfer in 3-hydroxyflavone with ultrafast transient infrared spectroscopy
Source: Royal Society of Chemistry journal article supplement (doi:10.1039/d4cc03427a), 2024-01-01
Supplement: d4cc03427a1.pdf [file d4cc03427a1.pdf]

## Supporting Information for:

### Characterizing excited-state intramolecular proton transfer in 3-hydroxyflavone with ultrafast transient infrared spectroscopy

Valerie S. Winkler<sup>1</sup> and Joseph A. Fournier<sup>1\*</sup>

<sup>1</sup>Department of Chemistry, Washington University in St. Louis, St. Louis, MO, USA 63130

\*corresponding authors: [jfournier@wustl.edu](mailto:jfournier@wustl.edu)

#### Contents:

##### I. Experimental methods.

- a. Transient infrared (Optical pump—IR probe).
- b. Transient absorption (IR pump—IR probe).

##### II. Synthesis of 3-hydroxy-2-(thiophen-2-yl)chromen-4-one (3HTC).

##### III. Computational procedures and results.

- a. Fig. S1. Optimized geometries for 3-hydroxyflavone (3HF) and 3HTC structures.
- b. Table I. Cartesian coordinates of 3HF and 3TC  $S_0$ ,  $S_1$ ,  $S_1'$  transition state, and  $S_1'$  structure calculations.

##### IV. Supplemental data and data analysis descriptions.

- a. Fig. S2. Steady-state UV-Vis spectra of 3HF and 3HTC.
- b. Fig. S3. Computed  $S_0$  vibrational spectra of 3HF and 3HTC.
- c. Fig. S4. Computed  $S_1'$  vibrational spectra of 3HF and 3HTC.
- d. Fig. S5. Computed  $S_1$  vibrational spectra of 3HF and 3HTC.
- e. Fig. S6. Select integration profiles of 3HF transient infrared data.
- f. Fig. S7. Select integration profiles of 3HTC transient infrared data.
- g. Fig. S8. Transient absorption spectrum of 3HF (IR pump—IR probe).
- h. Fig. S9. Transient absorption spectrum of 3HTC (IR pump—IR probe).
- i. Fig. S10. Low-frequency motions in  $S_0$  of 3HF and 3HTC.
- j. Table II. Transient infrared spectral data for 3HF and 3HTC at pump-probe delay times listed in the main text.
- k. Table III. Global analysis data for 3HF and 3HTC.

##### V. References.

## I. Experimental Methods

### a. Transient Infrared (Optical Pump—IR probe)

3HF was obtained commercially from Sigma-Aldrich and used without further purification. Synthesis of 3HTC and its characterization was guided by the procedure published by Gundoz et. al.<sup>1</sup> and is summarized in Section II of this Supporting Information.

Ultrafast UV/Vis and infrared pulses were both sourced from the outputs of a regenerative amplifier (Coherent Astrella, 800 nm, 30 fs, 1 kHz, 3.5 and 3.6 mJ/pulse) which pumped separate optical parametric amplifiers (OPA; Light Conversion, TOPAS Prime). UV/Vis light was generated by one OPA and its associated external crystal stages. The infrared probe pulse was formed by combining the signal and idler via a home-built difference frequency generator (1 mm AgGaS<sub>2</sub> crystal, Eksma Optics) and tuned for a center frequency series of 1600 cm<sup>-1</sup>, 1450 cm<sup>-1</sup>, and 1350 cm<sup>-1</sup> to cover the desired range. Frequency bandwidth of the IR pulses were between 200-300 cm<sup>-1</sup> with ~80 fs pulse width. Generation of IR probe and reference pulses was accomplished by reflections off the front face (probe, ~1% reflection) and back face (reference) of a 1 mm wedged CaF<sub>2</sub> window. A translation stage (Aerotech; ANT95L050-MP-PL2-TAS) was utilized to set the delay time  $\tau_2$  between pump and probe pulses with a maximum  $\tau_2$  of 10 ps. A lens (250 mm focal length, ThorLabs) focused the visible pump beam to a diameter of about 300  $\mu\text{m}$  at the sample; approximate pump fluence was 30  $\mu\text{J}/\text{mm}^2$  for all experiments. Excitation wavelengths were set to 363 nm and 379 nm for 3HF and 3HTC, respectively (Fig. S2). The probe pulse was then focused into the sample (100  $\mu\text{m}$  diameter) and overlapped with the visible pulse; a pump-probe geometry setup was used and the signal field was self-heterodyned by the probe pulse.

Timing between the visible and IR pulses was found by monitoring the free carrier absorption in a Si wafer, as shown in panel (a) from a difference spectrum calculated as the signal observed in the presence of the pump minus the absorbance signal without the pump. On this graph, absorption corresponds to a signal of negative intensity; due to the direction of the delay stage motion used, negative times correspond to the arrival of the probe after the pump. The derivative of the cumulative function distribution was then fit to a Gaussian profile (b) to extract the full width at half maximum for the instrument response function.

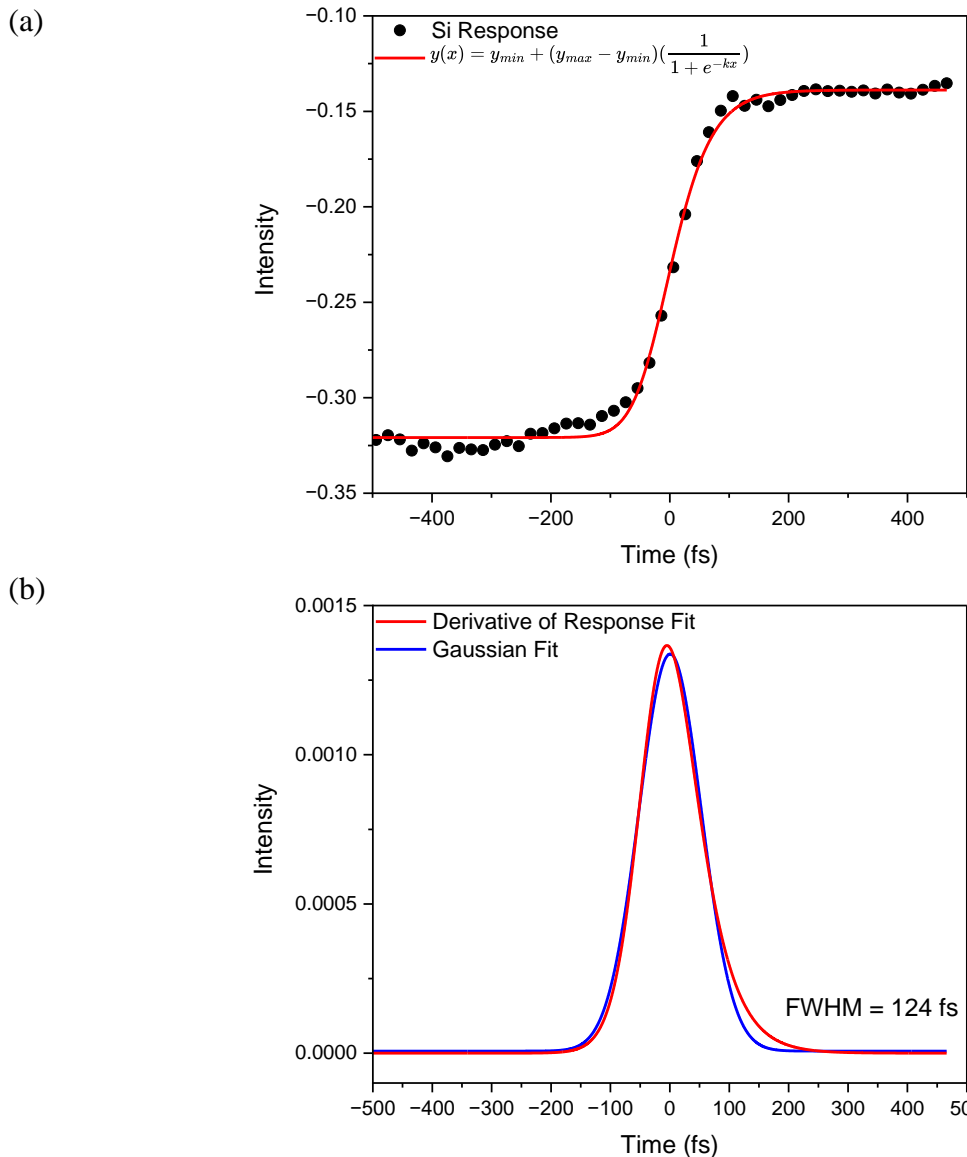

Measurement of the Si pump-probe response yielded the instrument response function (~130 fs FWHM). For detection, a monochromator dispersed the probe and reference lines onto an MCT focal-plane array detector ( $128 \times 128$  pixels, PhaseTech) to visualize the probe frequency axis.

All samples (3HF, 2 mM; 3HTC, 3 mM) were dissolved in  $\text{CDCl}_3$  and flowed at a rate of about 1 cm/s using a peristaltic pump (APT Instruments, SP10XV1R-509) through a flow cell with 300  $\mu\text{m}$  path length between two 1 mm  $\text{CaF}_2$  windows. The sample cell was rastered perpendicular to the probe path to avoid damaging the  $\text{CaF}_2$  windows. Multiple batches were used for each measurement to verify reproducibility. TRIR spectra were tracked during collection to ensure that there were no artifacts or contributions due to sample degradation; UV-Vis of the sample solution after collection did not show any new transitions at or lower in energy than the excitation wavelength.

## **b. Transient Absorption (IR pump—IR probe)**

For generation of infrared pulses, a regenerative amplifier (Coherent Astrella, 800 nm, 30 fs, 1 kHz, 3.6 mJ/pulse) was utilized to pump an optical parametric amplifier (OPA; Light Conversion, TOPAS Prime). Infrared pulses were formed by combining the signal and idler via a home-built difference frequency generator (1 mm AgGaS<sub>2</sub> crystal, Eksma Optics). IR probe and reference pulses were created from the reflections off the front face (probe, ~1% reflection) and back face (reference) of a wedged CaF<sub>2</sub> window (1 mm). The remaining IR light was transmitted through a pulse shaper (PhaseTech) to generate a pump pulse of the same center frequency and approximate bandwidth. Frequency bandwidth of the IR pulses were 180 cm<sup>-1</sup> at the FWHM with a center frequency of ~1440 cm<sup>-1</sup> and ~80 fs pulse width.

Delay time  $\tau_2$  between pump and probe pulses was controlled by a translation stage (Aerotech; ANT95L050-MP-PL2-TAS). Both pump and probe pulses focused onto the sample in the pump-probe geometry style (100  $\mu\text{m}$  diameter). The signal field was self-heterodyned by the probe pulse. The probe and reference lines were next dispersed by a monochromator before focusing onto the MCT focal-plane array detector (128  $\times$  128 pixels, PhaseTech).

Samples of 3HF and 3HTC were dissolved in CDCl<sub>3</sub> (80 mM) and placed into cells composed of CaF<sub>2</sub> windows (1 mm) and a 300  $\mu\text{m}$  Teflon spacer. Throughout collection, the sample cell was occasionally rastered perpendicular to the probe path in order to probe fresh spots of the sample.

## II. Synthesis of 3-hydroxy-2-(thiophen-2-yl)chromen-4-one

The following procedure is modified from reaction #15 listed in Gundoz et. al. for a general reaction path to form 3-hydroxyflavone derivatives.<sup>1</sup>

1. To a round-bottom flask (25 or 50 mL), add 353  $\mu$ L 2-hydroxyacetophenone, 270  $\mu$ L 2-thiophenecarboxaldehyde, ~0.5 g NaOH, and about 10 mL of MeOH. Place two stir bars in the flask, attach a Graham condenser, and suspend in an oil bath.
2. Stir and reflux (~400 rpm, 88°C) until the colour changes from pale yellow to orange, about 3 hrs.
3. Remove from oil bath. Cool to room temperature. Add 10 mL 0.5 N NaOH and 8 mmol H<sub>2</sub>O<sub>2</sub>.
4. Stir 2-3 hrs at room temperature. A solid product should form; the reaction mixture will thicken significantly and stirring rate may need to be decreased.
5. Pour reaction mixture into ~20 mL distilled water surrounded by ice bath.
6. Vacuum filter this diluted reaction mixture using a Büchner funnel. Lyophilize to sublimate any remaining water from the sample; this product will be orange-tinted powder.
7. Since the synthesis is performed in a basic solution, the product will likely be deprotonated. To remedy this, suspend the product in a few mL of water and add small aliquots of dilute HCl until the pH of the slurry is 5-6, mixing after each addition.
8. Vacuum filter the yellow, now-protonated product using a Büchner funnel; rinse with a small amount of cold, distilled water. Sublimate remaining water from the sample via lyophilizer.

Characterization:

Yellow solid, 58.3% yield.

UV-Vis in Fig. S2.

<sup>1</sup>H-NMR: [300 MHz, line broadening = 0.5 Hz, DMSO-d<sub>6</sub>]:  $\delta$  = 7.30 ppm (t, J = 4.3 Hz, 1H);  $\delta$  = 7.46 ppm (t, J = 7.3 Hz, 1H);  $\delta$  = 7.75 ppm (m, 2H);  $\delta$  = 7.90 ppm (dd, J = 1.2 Hz, J = 5.3 Hz, 1H);  $\delta$  = 7.96 ppm (d, J = 4.1 Hz, 1H);  $\delta$  = 8.09 ppm (dd, J = 1.5 Hz, J = 7.9, 1H);  $\delta$  = 10.22 ppm (s, 1H).

### III. Computational Procedures and Results

Calculations for geometry optimization and vibrational frequencies were performed using ORCA<sup>2</sup> with theory/basis B3LYP-D3BJ/aug-cc-pVDZ.<sup>3-8</sup> TDDFT was employed for excited-state calculations. Frequencies listed in this Supporting Information are scaled by 0.975. Transition states were calculated by NEB with aforementioned theory/basis using the optimized structures as endpoints.

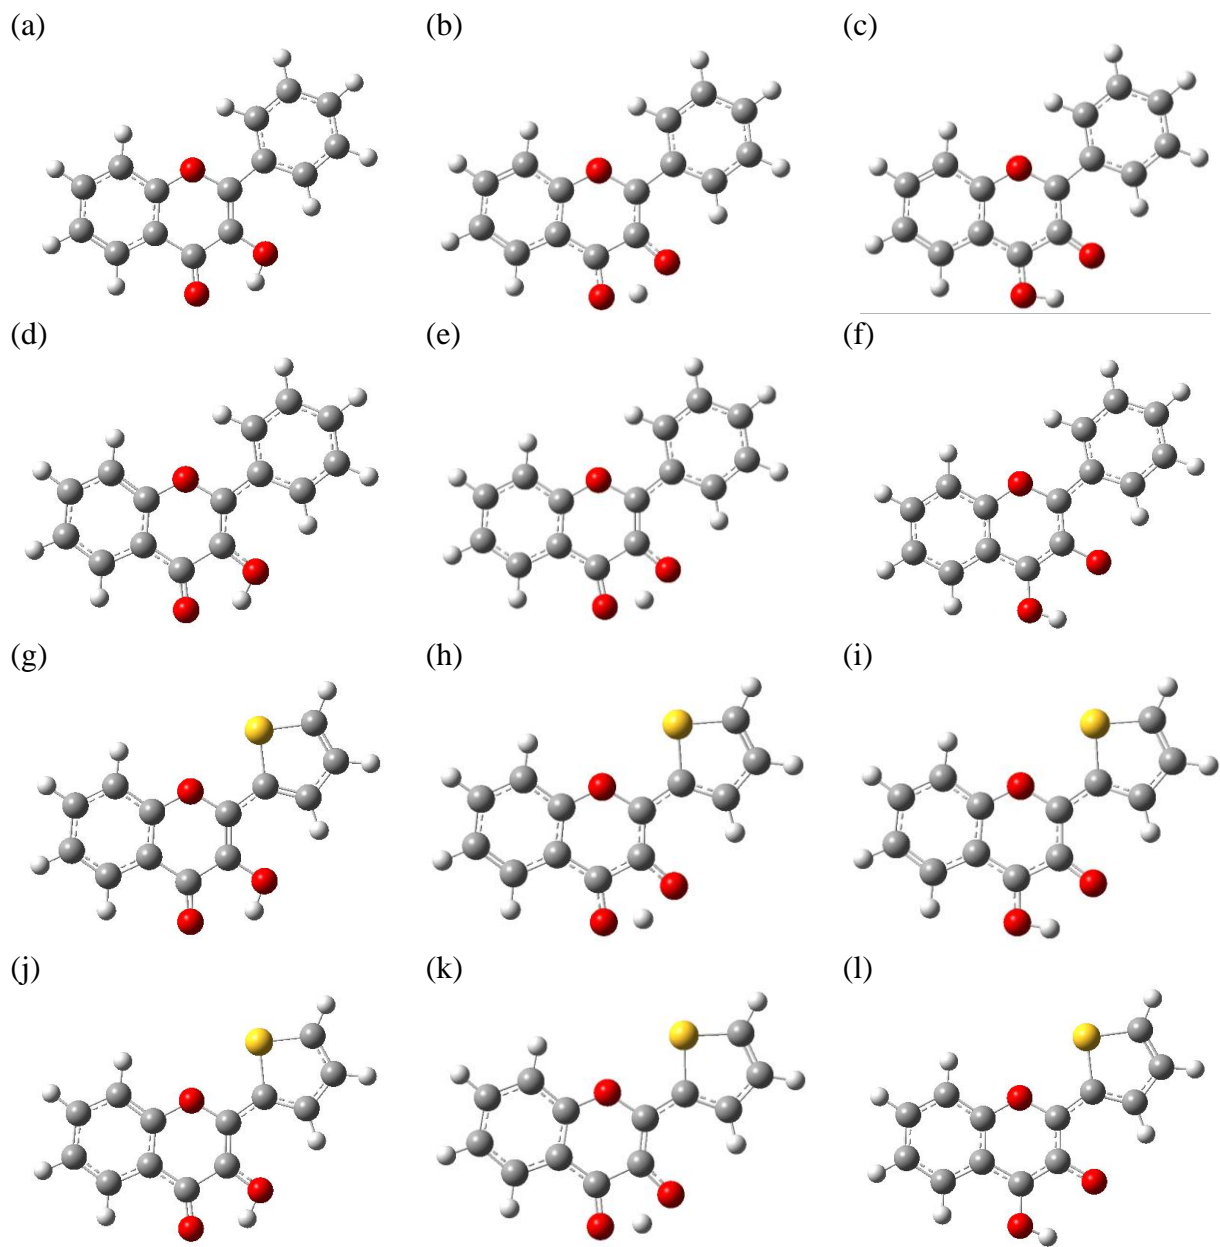

**Figure S1.** Optimized geometries for 3HF (a-f) and 3HTC (g-l). Configurations shown:  $S_0$  (a, g),  $S_0$  transition state (b, h),  $S_0'$  (c, i),  $S_1$  (d, j),  $S_1$  transition state (e, k), and  $S_1'$  (f, l).

**Table I.** Cartesian coordinates for the  $S_0$ ,  $S_1$ ,  $S_1'$  transition, and  $S_1'$  states of 3HF and 3HTC.

| <i>3HF-S<sub>0</sub></i> |           |           |           |
|--------------------------|-----------|-----------|-----------|
| C                        | -0.009134 | -0.100205 | 0.000918  |
| C                        | -0.005826 | -0.075652 | 1.411103  |
| C                        | 1.223193  | -0.104902 | 2.089034  |
| C                        | 2.437410  | -0.157589 | 1.388613  |
| C                        | 2.409858  | -0.179563 | 0.000842  |
| C                        | 1.185521  | -0.151024 | -0.698875 |
| H                        | -0.971677 | -0.077162 | -0.507636 |
| H                        | 3.373229  | -0.178864 | 1.944513  |
| H                        | 3.348517  | -0.219835 | -0.552066 |
| H                        | 1.183009  | -0.169376 | -1.788181 |
| C                        | -1.057143 | 0.003810  | 3.646695  |
| C                        | 0.179712  | -0.026939 | 4.237555  |
| C                        | -1.230426 | -0.020420 | 2.197416  |
| O                        | -2.383848 | 0.006786  | 1.736394  |
| O                        | -2.220801 | 0.056193  | 4.337667  |
| H                        | -2.903520 | 0.062556  | 3.631227  |
| O                        | 1.301271  | -0.082555 | 3.445513  |
| C                        | 0.511101  | -0.008879 | 5.667219  |
| C                        | -0.487316 | 0.089419  | 6.659268  |
| C                        | -0.138001 | 0.108543  | 8.009751  |
| C                        | 1.201270  | 0.028900  | 8.401659  |
| C                        | 2.197811  | -0.069911 | 7.425286  |
| C                        | 1.860288  | -0.087511 | 6.073681  |
| H                        | -1.531452 | 0.150778  | 6.373557  |
| H                        | -0.923000 | 0.186462  | 8.762133  |
| H                        | 1.467125  | 0.044139  | 9.458906  |
| H                        | 3.246126  | -0.132734 | 7.718059  |
| H                        | 2.643821  | -0.163297 | 5.324806  |

| <i>3HTC-S<sub>0</sub></i> |           |           |           |
|---------------------------|-----------|-----------|-----------|
| C                         | -2.362142 | 3.111047  | 2.001485  |
| C                         | -1.731492 | 2.500850  | 0.898142  |
| C                         | -1.970356 | 3.015301  | -0.387232 |
| C                         | -2.817278 | 4.113689  | -0.586846 |
| C                         | -3.427208 | 4.697737  | 0.515870  |
| C                         | -3.201479 | 4.198272  | 1.814640  |
| H                         | -2.166274 | 2.700945  | 2.990970  |
| H                         | -2.978640 | 4.484673  | -1.597577 |
| H                         | -4.087850 | 5.552658  | 0.370917  |
| H                         | -3.687908 | 4.668441  | 2.668606  |
| C                         | 0.447979  | 0.779075  | -5.131986 |
| C                         | 1.107131  | -0.163843 | -4.379961 |
| C                         | 0.832097  | -0.053652 | -2.988846 |
| C                         | -0.040074 | 0.981071  | -2.692608 |
| H                         | 0.475913  | 0.921698  | -6.208576 |
| H                         | 1.768687  | -0.914204 | -4.808488 |
| H                         | 1.251351  | -0.701443 | -2.226097 |
| O                         | -1.394768 | 2.478354  | -1.500193 |
| O                         | -0.542349 | 0.803064  | 2.118506  |
| O                         | 0.559519  | -0.219825 | -0.052298 |
| C                         | -0.839221 | 1.354278  | 1.045203  |
| C                         | -0.267589 | 0.843252  | -0.190525 |
| C                         | -0.549316 | 1.402299  | -1.409562 |
| H                         | 0.564028  | -0.385182 | 0.914510  |
| S                         | -0.527229 | 1.829226  | -4.155068 |

| <i>3HF-S<sub>1</sub></i> |           |           |           |
|--------------------------|-----------|-----------|-----------|
| C                        | -1.000513 | 0.376004  | 0.000247  |
| C                        | 0.428539  | 0.393720  | -0.000028 |
| C                        | 1.111927  | -0.850132 | -0.000264 |
| C                        | 0.437297  | -2.060154 | -0.000426 |
| C                        | -0.984430 | -2.053788 | -0.000102 |
| C                        | -1.681988 | -0.842002 | 0.000303  |
| H                        | -1.527905 | 1.327252  | 0.000464  |
| H                        | 1.002496  | -2.989969 | -0.000682 |
| H                        | -1.523753 | -2.999981 | -0.000142 |

| <i>3HTC-S<sub>1</sub></i> |           |          |           |
|---------------------------|-----------|----------|-----------|
| C                         | -1.573925 | 0.638749 | 0.049843  |
| C                         | -0.928701 | 0.005176 | -1.059812 |
| C                         | -1.180560 | 0.527722 | -2.359494 |
| C                         | -2.025630 | 1.605197 | -2.568068 |
| C                         | -2.653018 | 2.213627 | -1.452489 |
| C                         | -2.416558 | 1.725187 | -0.159468 |
| H                         | -1.385409 | 0.244747 | 1.046115  |
| H                         | -2.190819 | 1.965333 | -3.581802 |
| H                         | -3.319099 | 3.061228 | -1.608007 |

|   |           |           |           |
|---|-----------|-----------|-----------|
| H | -2.772233 | -0.847372 | 0.000603  |
| C | 2.692762  | 1.414543  | -0.000337 |
| C | 3.313509  | 0.171055  | -0.000517 |
| C | 1.199350  | 1.587825  | -0.000050 |
| O | 0.814093  | 2.782019  | -0.001068 |
| O | 3.318719  | 2.583067  | -0.000135 |
| H | 2.535864  | 3.218775  | 0.000649  |
| O | 2.501050  | -0.929423 | -0.000537 |
| C | 4.721743  | -0.137971 | -0.000369 |
| C | 5.719182  | 0.878729  | -0.000341 |
| C | 7.065338  | 0.539939  | -0.000058 |
| C | 7.466335  | -0.806088 | 0.000213  |
| C | 6.493930  | -1.818823 | 0.000156  |
| C | 5.143599  | -1.498706 | -0.000153 |
| H | 5.427448  | 1.923875  | -0.000546 |
| H | 7.815880  | 1.330218  | -0.000034 |
| H | 8.525740  | -1.062795 | 0.000464  |
| H | 6.798793  | -2.865340 | 0.000357  |
| H | 4.395158  | -2.286125 | -0.000176 |

|   |           |           |           |
|---|-----------|-----------|-----------|
| H | -2.903105 | 2.200624  | 0.692623  |
| C | 1.237118  | -1.705974 | -7.135750 |
| C | 1.907805  | -2.657963 | -6.379329 |
| C | 1.640938  | -2.557101 | -5.000773 |
| C | 0.751163  | -1.514182 | -4.696509 |
| H | 1.272321  | -1.568505 | -8.213223 |
| H | 2.572429  | -3.400159 | -6.817238 |
| H | 2.067689  | -3.201513 | -4.238373 |
| O | -0.599179 | -0.014257 | -3.502548 |
| O | 0.275393  | -1.740036 | 0.109138  |
| O | 1.307167  | -2.700013 | -2.008463 |
| C | -0.071152 | -1.120874 | -0.924110 |
| C | 0.511404  | -1.655011 | -2.201458 |
| C | 0.243815  | -1.094567 | -3.434985 |
| H | 1.258510  | -2.804521 | -1.012833 |
| S | 0.255684  | -0.659213 | -6.166752 |

| <i>3HF-S<sub>1</sub> Transition State</i> |           |           |           |
|-------------------------------------------|-----------|-----------|-----------|
| C                                         | -3.818802 | 0.596428  | 0.008091  |
| C                                         | -2.391244 | 0.596422  | -0.001910 |
| C                                         | -1.708456 | -0.654076 | -0.012273 |
| C                                         | -2.406714 | -1.855752 | -0.014437 |
| C                                         | -3.821398 | -1.829811 | -0.004944 |
| C                                         | -4.512342 | -0.610704 | 0.007103  |
| H                                         | -4.333927 | 1.554928  | 0.016611  |
| H                                         | -1.857794 | -2.795278 | -0.023507 |
| H                                         | -4.373516 | -2.768913 | -0.006084 |
| H                                         | -5.602263 | -0.605393 | 0.014698  |
| C                                         | -0.109377 | 1.606611  | 0.002721  |
| C                                         | 0.497246  | 0.360810  | -0.010776 |
| C                                         | -1.590033 | 1.752948  | 0.000754  |
| O                                         | -1.918307 | 2.991810  | 0.007768  |
| O                                         | 0.422130  | 2.802941  | 0.016394  |
| H                                         | -0.682835 | 3.341096  | 0.012704  |
| O                                         | -0.333991 | -0.743638 | -0.026032 |
| C                                         | 1.900969  | 0.038745  | -0.005977 |
| C                                         | 2.889340  | 1.061590  | -0.016618 |
| C                                         | 4.237936  | 0.732113  | -0.007932 |
| C                                         | 4.647968  | -0.611369 | 0.007940  |

| <i>3HTC-S<sub>1</sub> Transition State</i> |           |           |           |
|--------------------------------------------|-----------|-----------|-----------|
| C                                          | -1.303637 | 1.193804  | 2.954152  |
| C                                          | -0.683630 | 0.557649  | 1.834495  |
| C                                          | -0.948268 | 1.070761  | 0.529000  |
| C                                          | -1.800417 | 2.152966  | 0.338128  |
| C                                          | -2.402466 | 2.759746  | 1.461065  |
| C                                          | -2.145712 | 2.280468  | 2.756111  |
| H                                          | -1.096564 | 0.801991  | 3.948071  |
| H                                          | -1.987280 | 2.515681  | -0.670798 |
| H                                          | -3.070008 | 3.608665  | 1.317385  |
| H                                          | -2.616224 | 2.760954  | 3.613885  |
| C                                          | 1.504613  | -1.120501 | -4.258636 |
| C                                          | 2.153839  | -2.082616 | -3.502003 |
| C                                          | 1.863968  | -1.995467 | -2.123140 |
| C                                          | 0.980097  | -0.953171 | -1.823942 |
| H                                          | 1.553973  | -0.971119 | -5.333827 |
| H                                          | 2.819894  | -2.827127 | -3.934514 |
| H                                          | 2.267998  | -2.650336 | -1.355747 |
| O                                          | -0.392944 | 0.524425  | -0.606132 |
| O                                          | 0.574308  | -1.227577 | 2.935960  |
| O                                          | 1.531438  | -2.120292 | 0.979939  |
| C                                          | 0.171719  | -0.556160 | 1.919871  |



|   |          |           |           |
|---|----------|-----------|-----------|
| C | 3.682845 | -1.629064 | 0.015230  |
| C | 2.328512 | -1.318017 | 0.009498  |
| H | 2.581289 | 2.103605  | -0.031629 |
| H | 4.982582 | 1.528271  | -0.016030 |
| H | 5.709296 | -0.860686 | 0.013463  |
| H | 3.994535 | -2.673775 | 0.027763  |
| H | 1.586351 | -2.111841 | 0.017410  |

|   |          |           |           |
|---|----------|-----------|-----------|
| C | 0.761906 | -1.108849 | 0.675331  |
| C | 0.476805 | -0.550885 | -0.555410 |
| H | 1.269571 | -1.986880 | 2.190124  |
| S | 0.517022 | -0.076127 | -3.289367 |

| <i>3HF-S<sub>1</sub>'</i> |            |           |           |
|---------------------------|------------|-----------|-----------|
| C                         | -1.063329  | -0.221095 | -0.000811 |
| C                         | -2.472405  | -0.254174 | 0.012896  |
| C                         | -3.115233  | -1.508056 | 0.043992  |
| C                         | -2.392966  | -2.697403 | 0.052877  |
| C                         | -0.993748  | -2.644548 | 0.040299  |
| C                         | -0.334508  | -1.411002 | 0.015841  |
| H                         | -0.561642  | 0.743553  | -0.024125 |
| H                         | -2.929594  | -3.644258 | 0.075966  |
| H                         | -0.421524  | -3.571747 | 0.049914  |
| H                         | 0.754607   | -1.376610 | 0.007035  |
| C                         | -4.684520  | 0.774799  | -0.043929 |
| C                         | -5.287257  | -0.482761 | 0.003541  |
| C                         | -3.296705  | 0.915838  | -0.002761 |
| O                         | -2.675025  | 2.131330  | -0.050537 |
| O                         | -5.411299  | 1.901287  | -0.144026 |
| O                         | -4.481386  | -1.600641 | 0.086721  |
| C                         | -6.702717  | -0.759293 | 0.010185  |
| C                         | -7.658893  | 0.277493  | 0.109649  |
| C                         | -9.021695  | -0.000364 | 0.088463  |
| C                         | -9.474731  | -1.322696 | -0.013288 |
| C                         | -8.539610  | -2.360976 | -0.096260 |
| C                         | -7.173692  | -2.092746 | -0.082970 |
| H                         | -7.333662  | 1.312391  | 0.224605  |
| H                         | -9.737326  | 0.818288  | 0.165610  |
| H                         | -10.543008 | -1.538791 | -0.019485 |
| H                         | -8.880019  | -3.394121 | -0.174715 |
| H                         | -6.457893  | -2.907852 | -0.153007 |
| H                         | -3.322477  | 2.841160  | 0.033223  |

| <i>3HTC-S<sub>1</sub>'</i> |           |           |           |
|----------------------------|-----------|-----------|-----------|
| C                          | -0.927537 | 0.623477  | -0.003480 |
| C                          | -0.358895 | 0.008056  | -1.135327 |
| C                          | -0.687868 | 0.514636  | -2.408154 |
| C                          | -1.549563 | 1.594325  | -2.567608 |
| C                          | -2.108114 | 2.190015  | -1.429746 |
| C                          | -1.797793 | 1.704843  | -0.155234 |
| H                          | -0.680631 | 0.237510  | 0.982972  |
| H                          | -1.776809 | 1.949014  | -3.571369 |
| H                          | -2.787207 | 3.034310  | -1.544964 |
| H                          | -2.234898 | 2.172991  | 0.726287  |
| C                          | 1.864301  | -1.601321 | -7.178254 |
| C                          | 2.443964  | -2.604406 | -6.433969 |
| C                          | 2.102725  | -2.550496 | -5.059834 |
| C                          | 1.267700  | -1.475388 | -4.746651 |
| H                          | 1.940643  | -1.425656 | -8.247156 |
| H                          | 3.086129  | -3.370161 | -6.865499 |
| H                          | 2.441198  | -3.274211 | -4.323793 |
| O                          | -0.188433 | -0.065158 | -3.549544 |
| O                          | 0.833160  | -1.619263 | 0.160657  |
| O                          | 2.004087  | -2.589937 | -2.160322 |
| C                          | 0.521540  | -1.124009 | -1.072864 |
| C                          | 1.100610  | -1.603307 | -2.240814 |
| C                          | 0.763029  | -1.056957 | -3.489084 |
| H                          | 1.346483  | -2.431672 | 0.065438  |
| S                          | 0.880764  | -0.548225 | -6.200806 |

#### IV. Supplemental Data and Data Analysis Descriptions

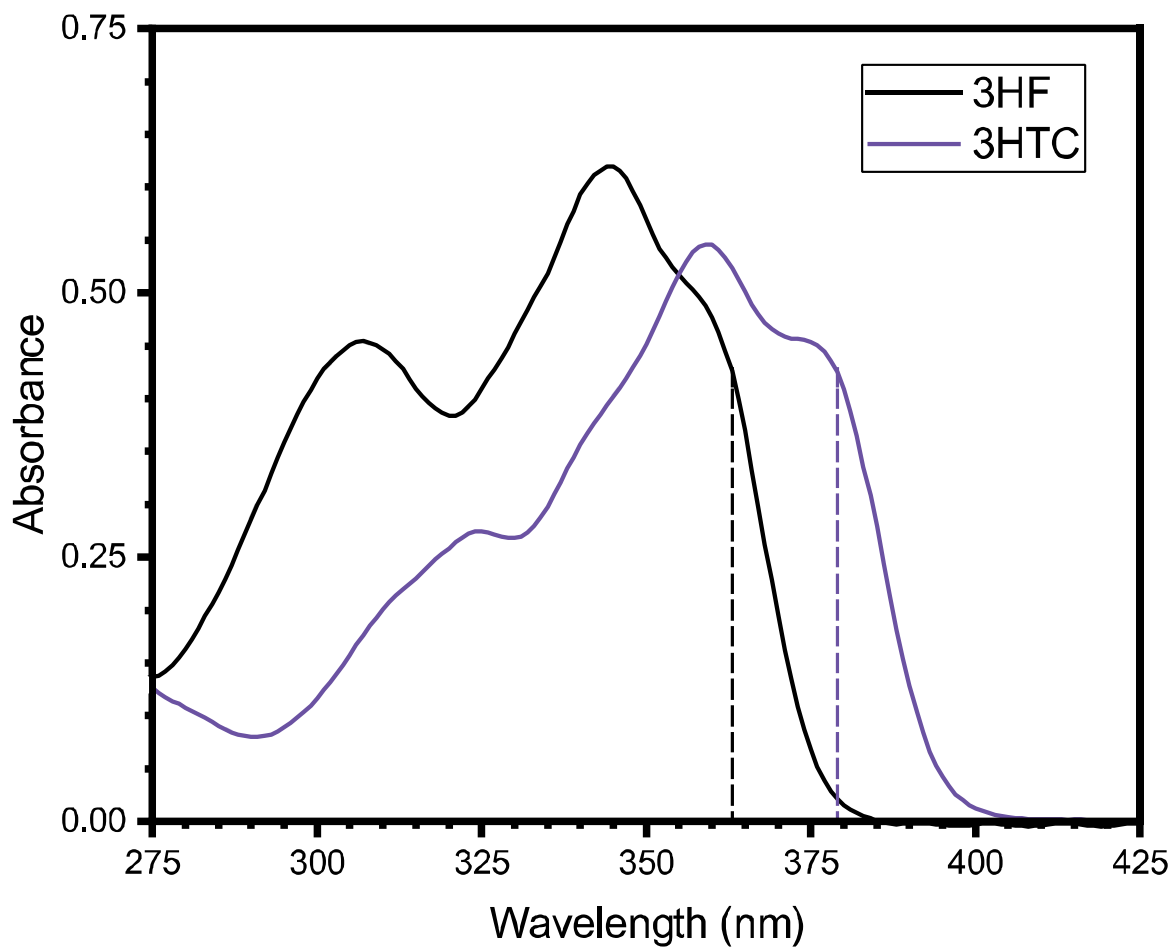

**Fig. S2.** Steady-state UV-Vis spectra in CDCl<sub>3</sub> of 3HF (~45  $\mu$ M, black) and 3HTC (~60  $\mu$ M, purple). Excitation wavelengths (3HF, 363 nm; 3HTC, 379 nm) used in this experiment are designated by the dashed lines.

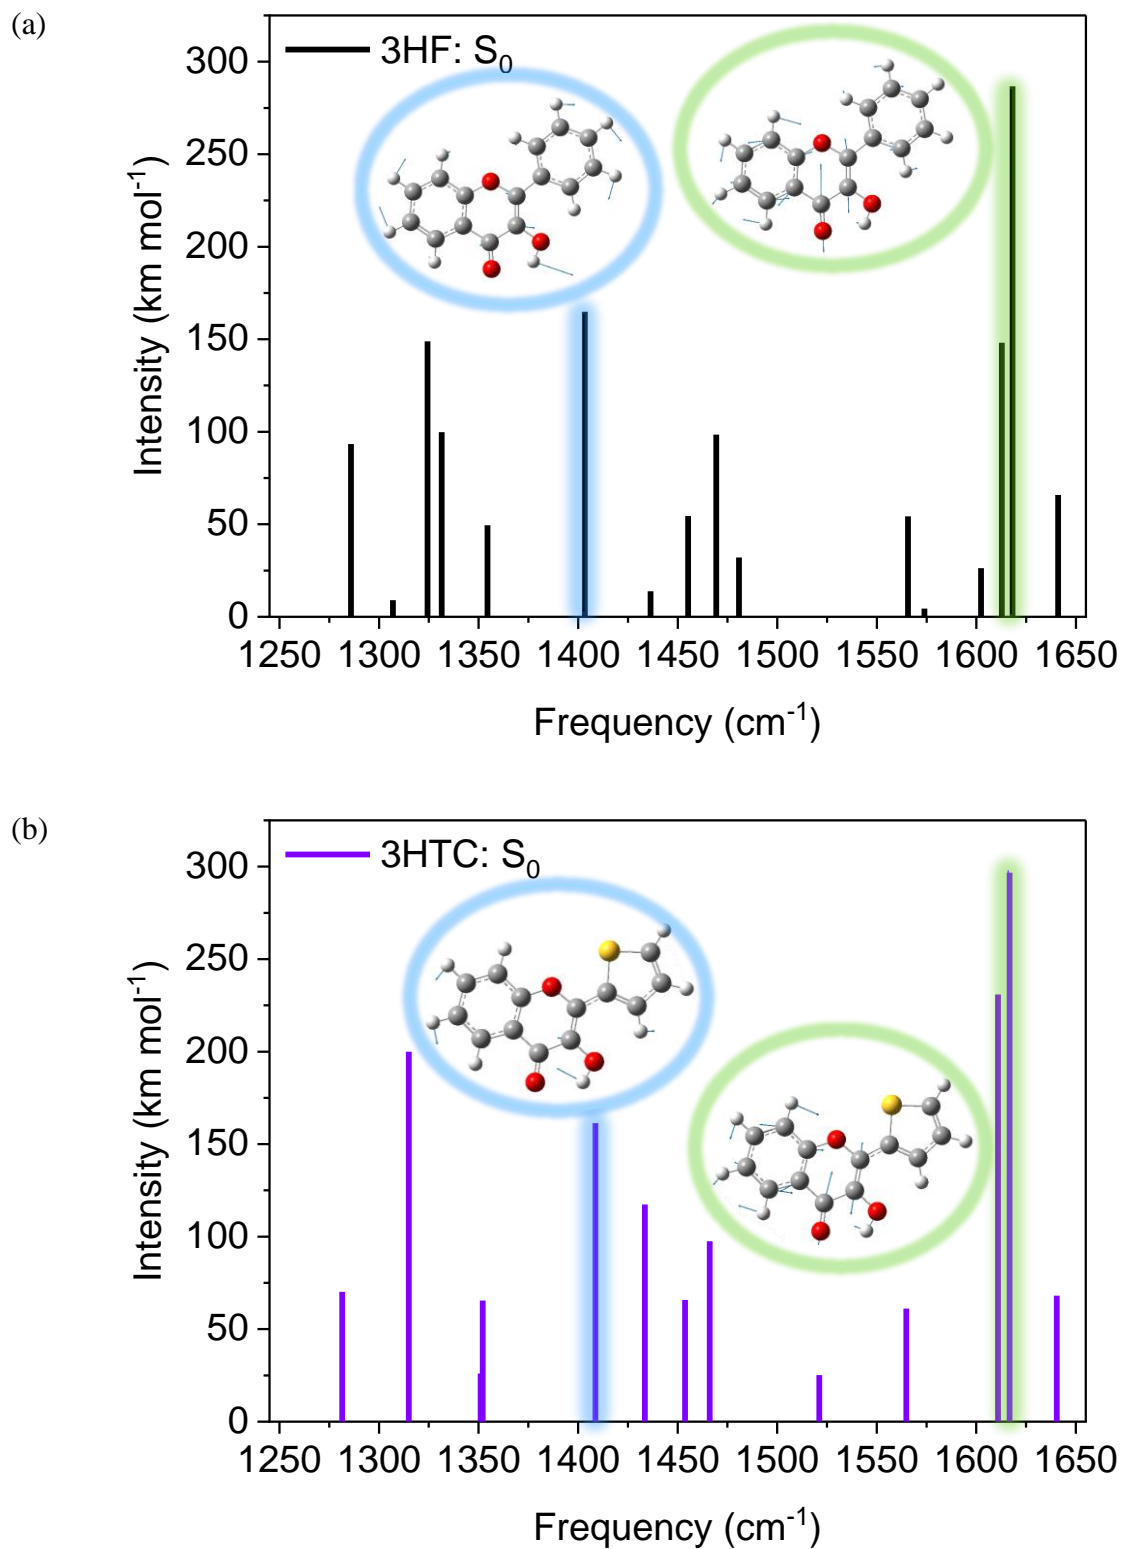

**Fig. S3.** Computed vibrational spectra for the  $S_0$  state of 3HF (a) and 3HTC (b) with selected vibrational modes visualized, labeled with corresponding colours.

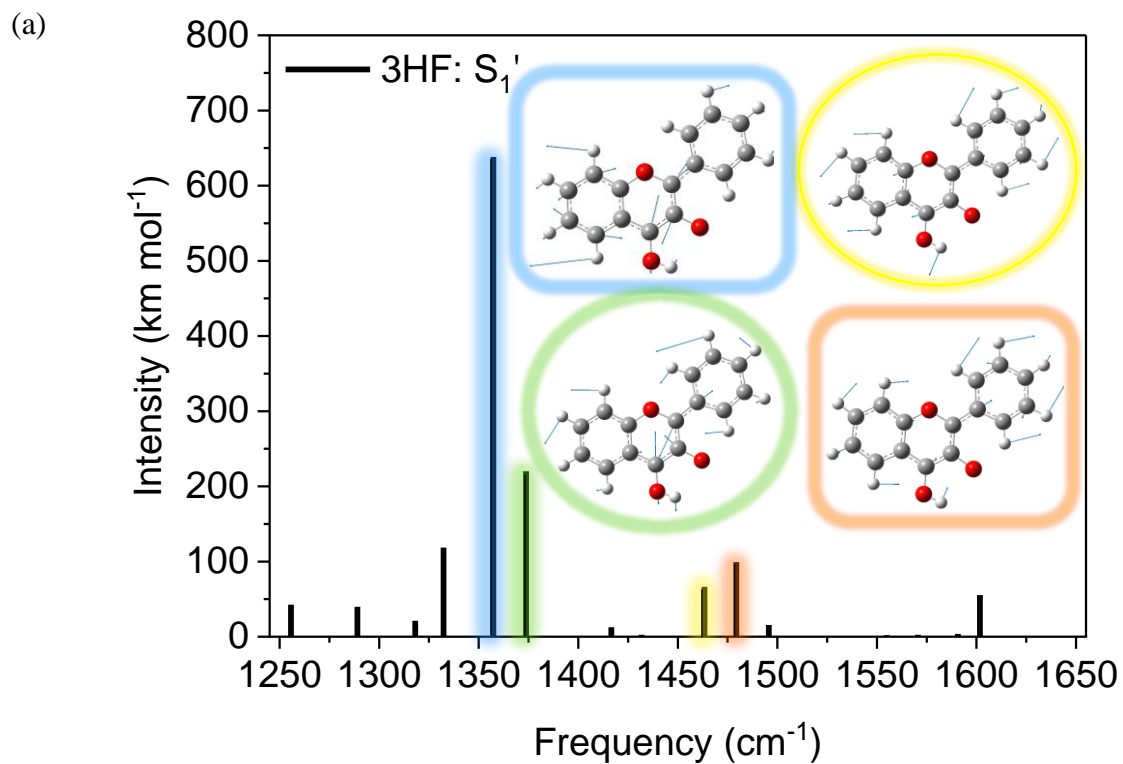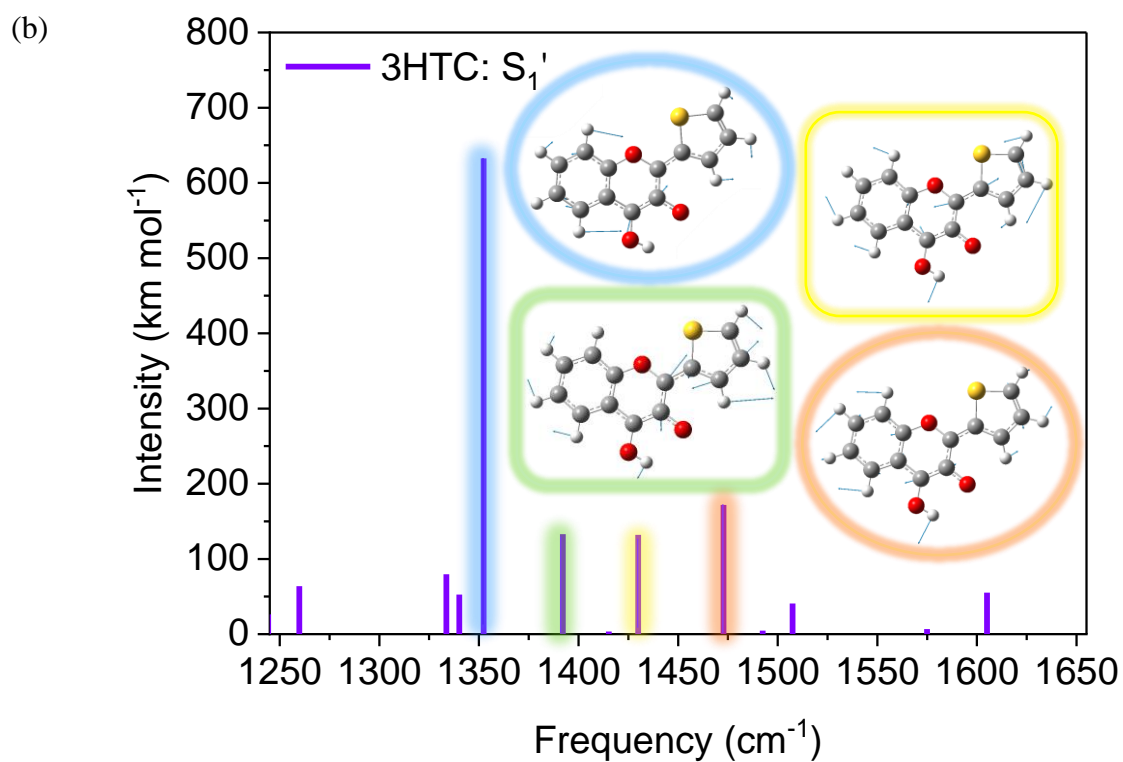

**Fig. S4.** Computed vibrational spectra for the  $S_1'$  state of 3HF (a) and 3HTC (b) with selected vibrational modes visualized, labeled with corresponding colours.

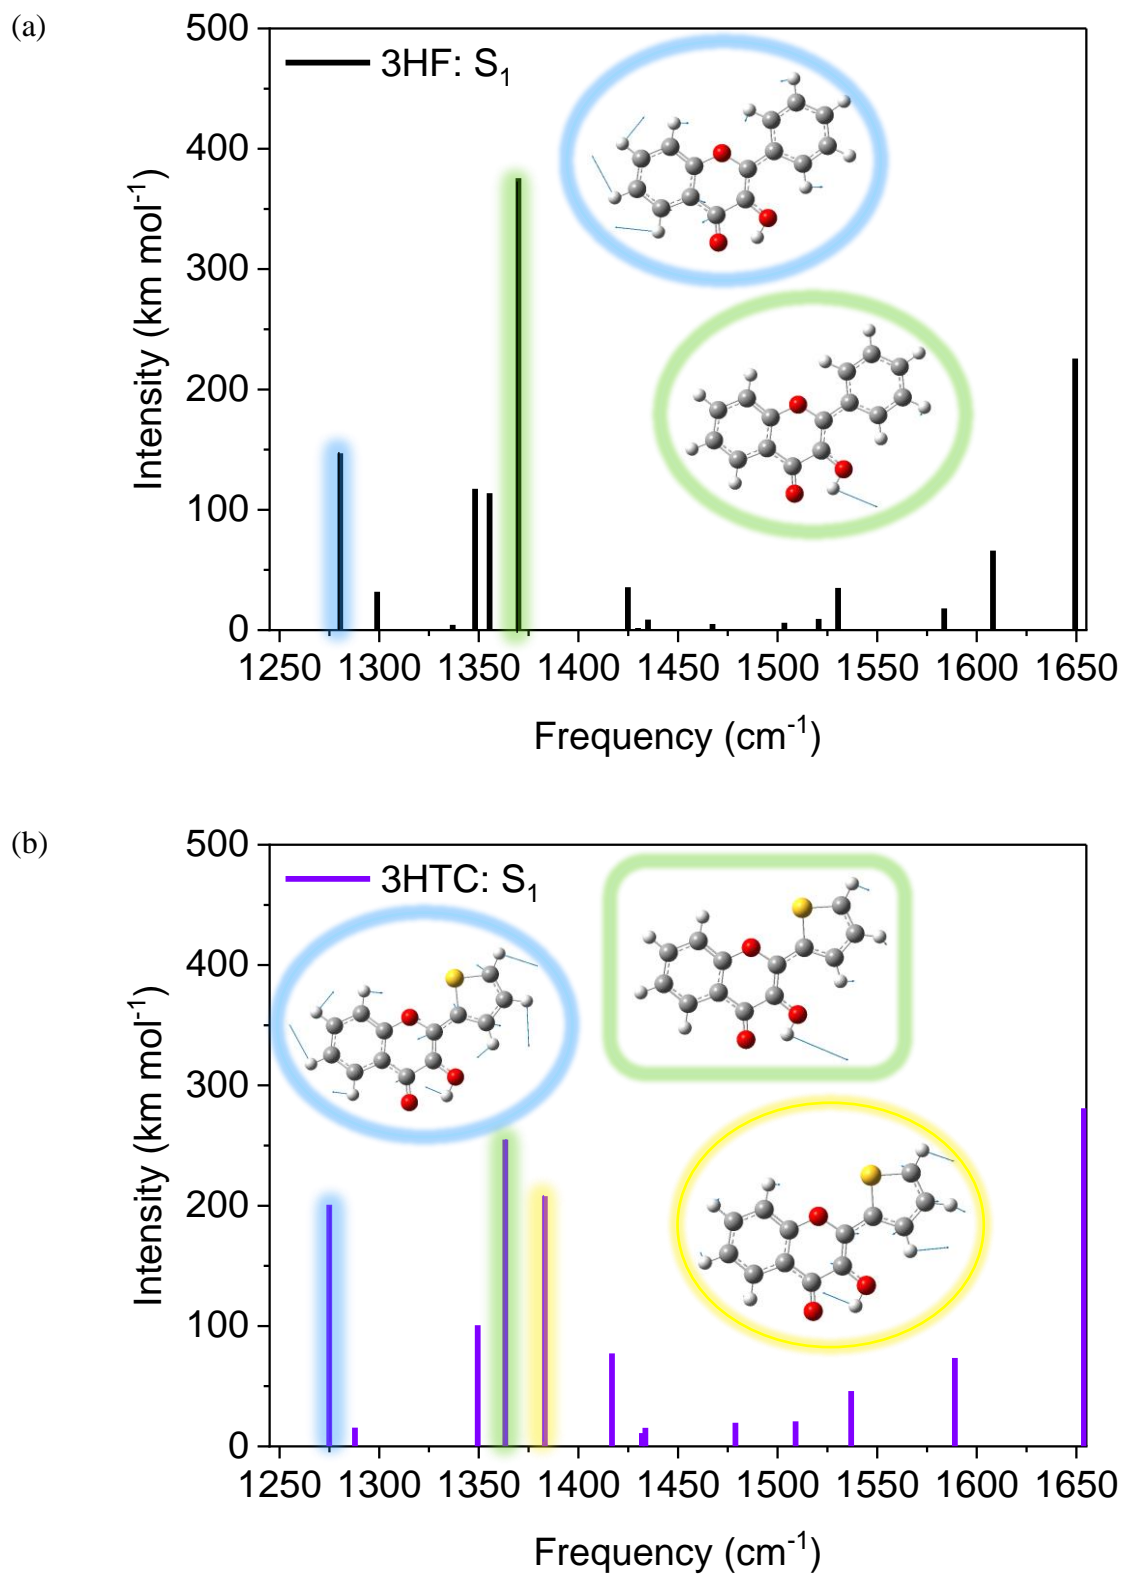

**Fig. S5.** Computed vibrational spectra for the  $S_1$  state of 3HF (a) and 3HTC (b) with selected vibrational modes visualized, labeled with corresponding colours.

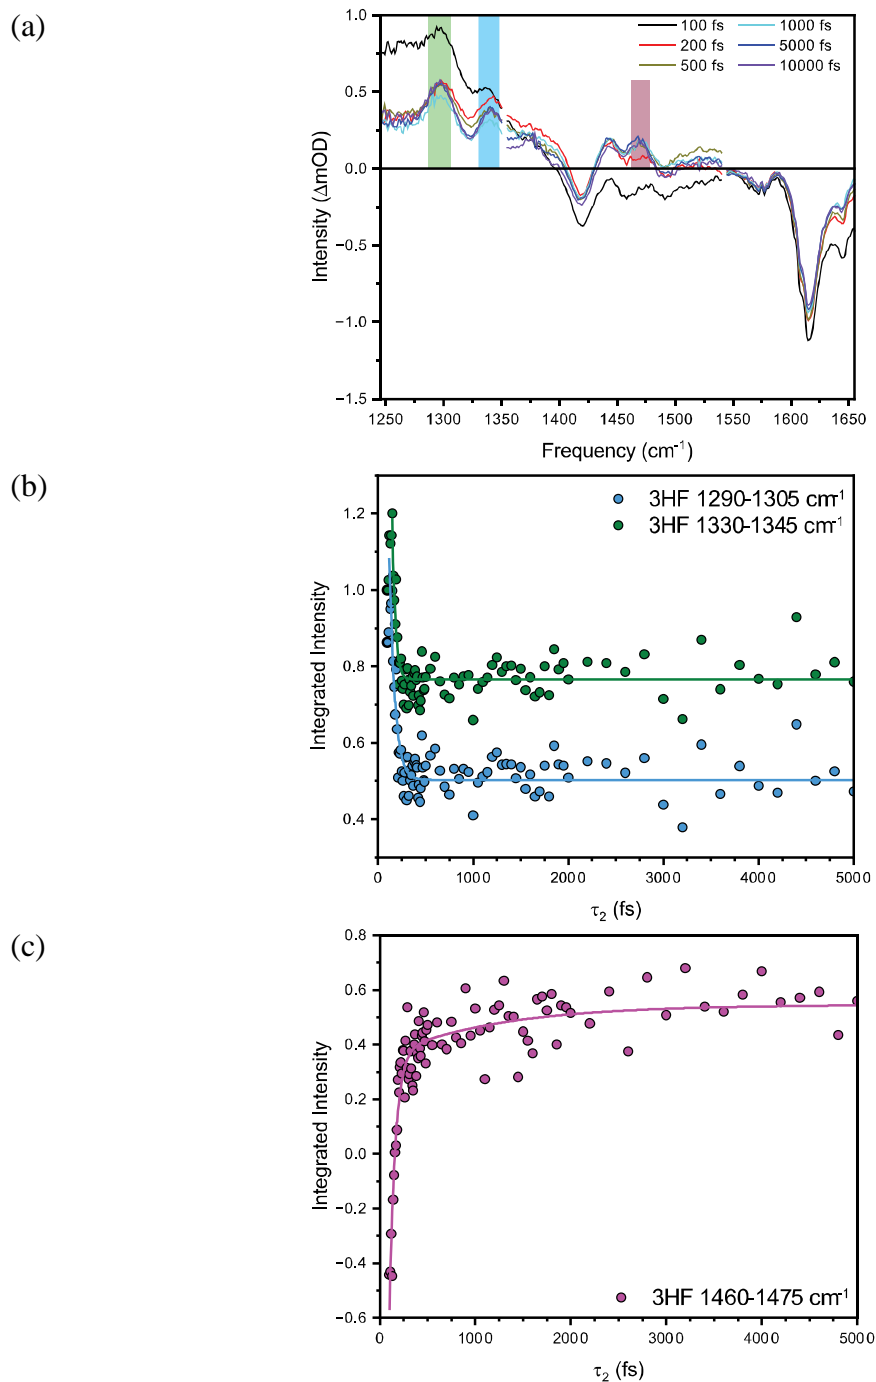

**Fig. S6.** Integrations of transient infrared data for 3HF (a) over respectively-colored chosen frequency regions. Monoexponential decay fitting was performed for the 1290-1305  $\text{cm}^{-1}$  and 1330-1345  $\text{cm}^{-1}$  regions (b), giving respective time constants of  $57 \pm 6$  fs and  $32 \pm 5$  fs. The absorbance at 1460-1475  $\text{cm}^{-1}$  was fit to a biexponential growth function (c), with time constants of  $63 \pm 9$  fs (amplitude 4.58) and  $1.2 \pm 0.5$  ps (amplitude 0.20).

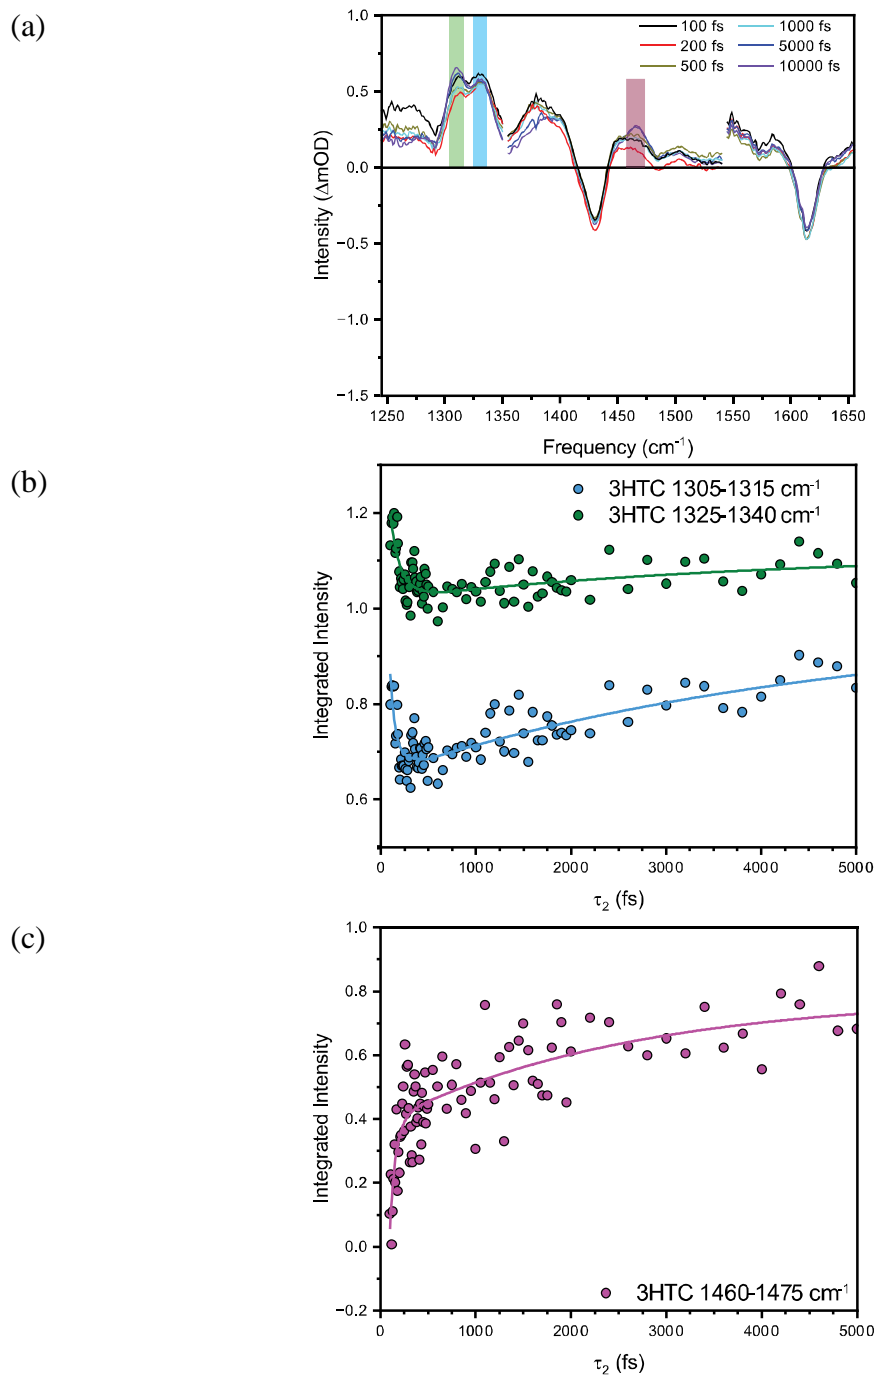

**Fig. S7.** Integrations of transient infrared data for 3HTC (a) over respectively-colored chosen frequency regions. Fitting was performed for the 1305-1315  $\text{cm}^{-1}$  and 1325-1340  $\text{cm}^{-1}$  regions using an exponential decay followed by exponential growth (b), giving respective decay time constants of  $53 \pm 16$  fs and  $96 \pm 28$  fs and growth time constants of  $4.7 \pm 1.3$  ps and  $4.0 \pm 3.0$  ps. The 1460-1475  $\text{cm}^{-1}$  region was fit to a biexponential growth function (c), with time constants of  $64 \pm 24$  fs (amplitude 1.62) and  $2.5 \pm 0.7$  ps (amplitude 0.40).

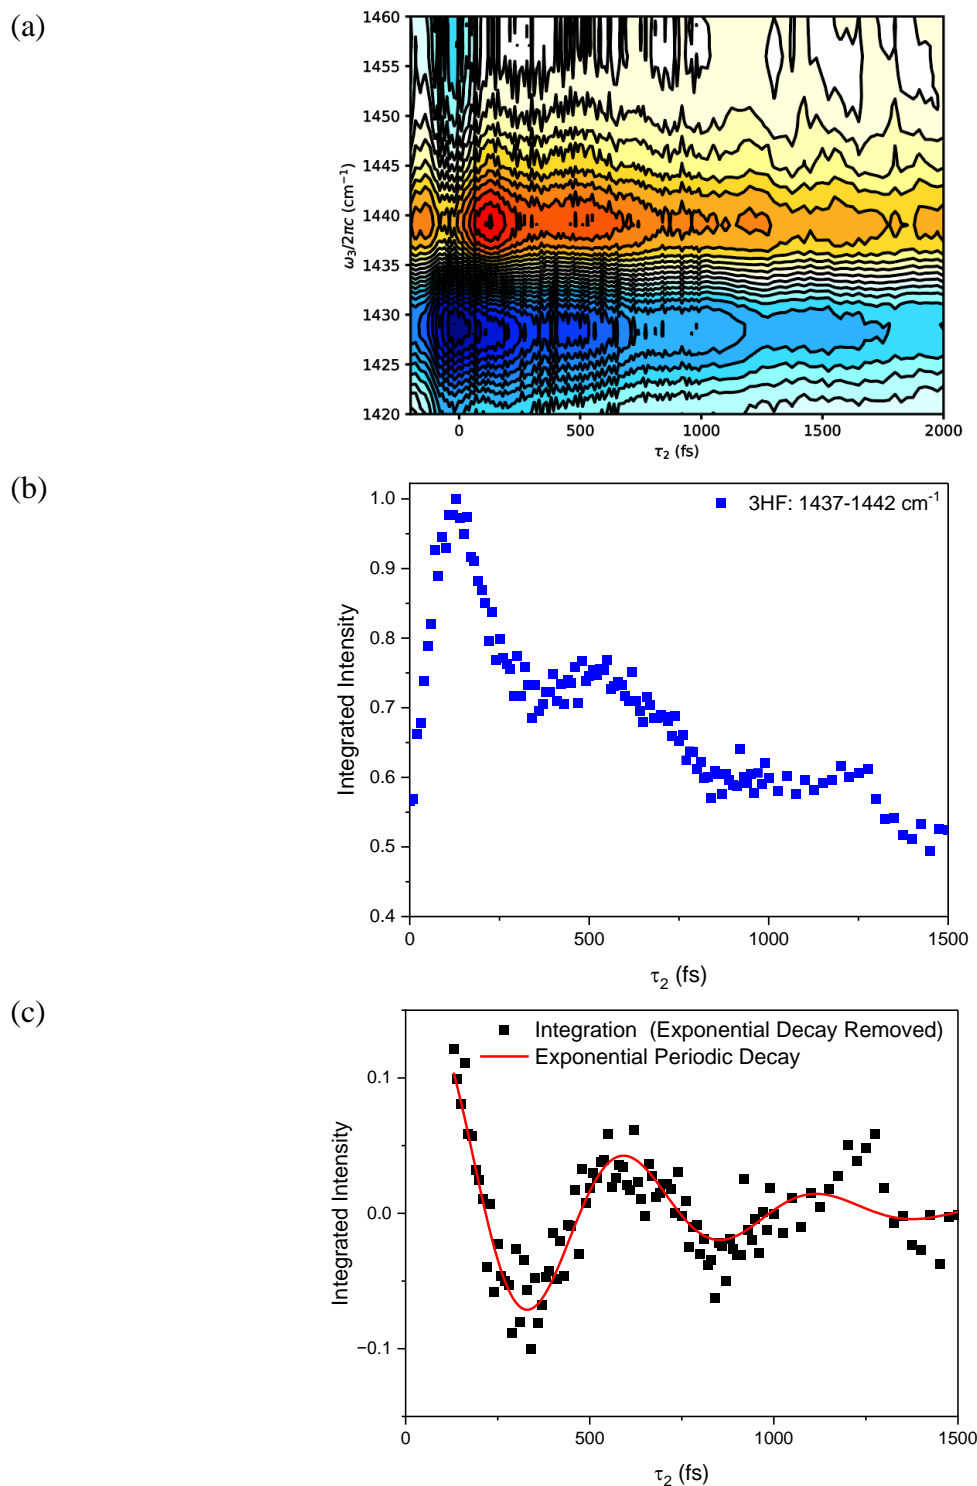

**Fig. S8.** (a) Ground-state transient absorption contour plot (IR pump-IR probe) of 3HF OH bend transition near  $1440\text{ cm}^{-1}$ , where integration over the bleach region (b) displays oscillatory behaviour. After subtraction of the primary exponential decay component,  $y = 0.4248 + 0.52278 * e^{(-t/913.69603)}$ , the remaining profile (c) was fit from 100 fs onward with an exponential periodic decay function to extract the oscillation period,  $261 \pm 6$  fs.



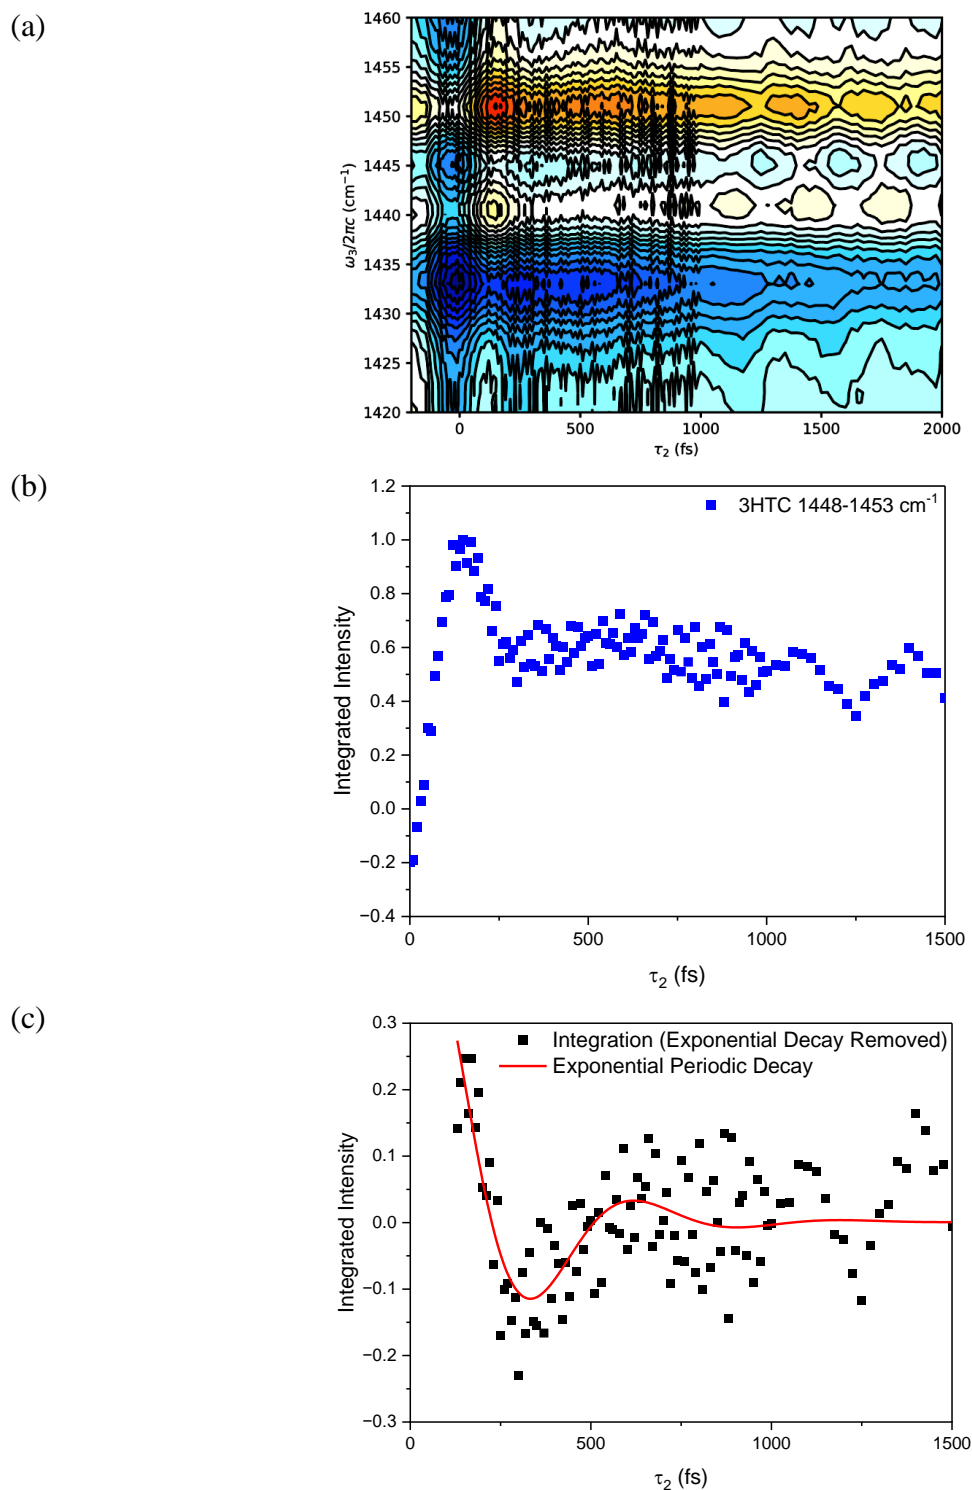

**Fig. S9.** (a) Ground-state transient absorption contour plot (IR pump-IR probe) of 3HTC OH bend transition near 1450  $\text{cm}^{-1}$ . Integration over the bleach region (b) displays oscillatory behaviour. After subtraction of the primary exponential decay component  $y = 0.13587 + 0.66472 * e^{(-t/1938.01769)}$ , the remaining profile (c) was fit from 100 fs with an exponential periodic decay function to retrieve the oscillation period,  $270 \pm 22$  fs.

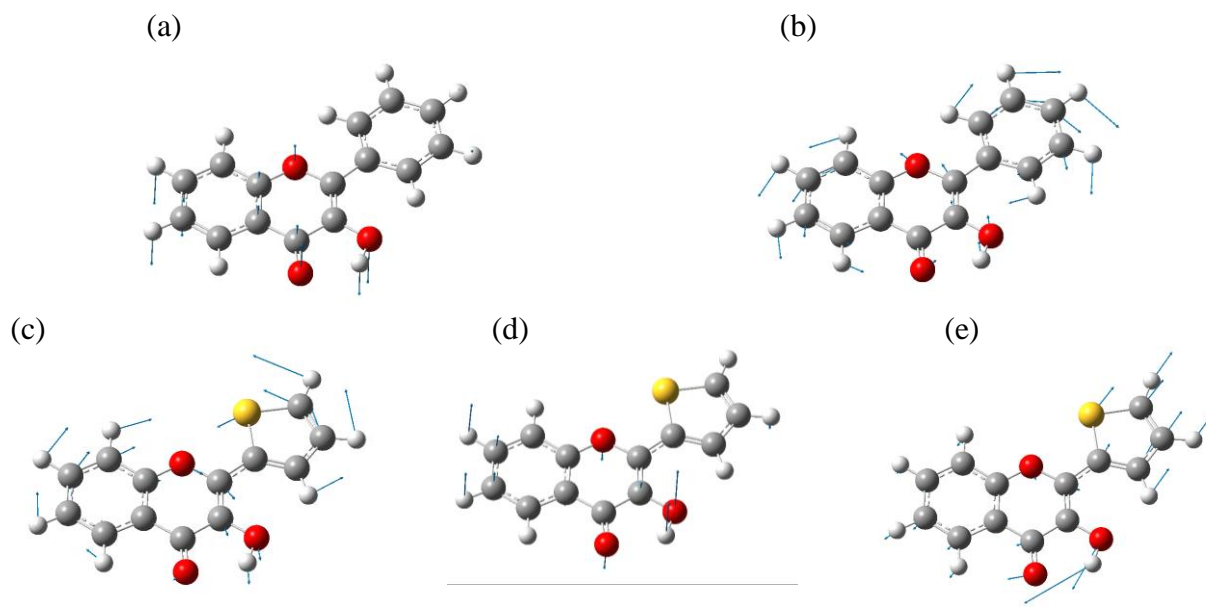

**Fig. S10.** Low-frequency motions involving the proton transfer coordinate in  $S_0$  of 3HF: (a)  $102\text{ cm}^{-1}$  out-of-plane motion. (b)  $118\text{ cm}^{-1}$  in-plane mode. Analogous low-frequency motions in  $S_0$  of 3HTC: (c)  $102\text{ cm}^{-1}$  and (d)  $107\text{ cm}^{-1}$  out-of-plane motions, (e)  $250\text{ cm}^{-1}$  in-plane motion.

**Table II.** Transient infrared spectral data for 3HF and 3HTC at pump-probe delay times listed in the main text.

| <i>TRIR Data</i> | <i>3HF</i>                       |                        |                        |                        |                         |                         | <i>3HTC</i>              |                        |                        |                        |                         |                         |
|------------------|----------------------------------|------------------------|------------------------|------------------------|-------------------------|-------------------------|--------------------------|------------------------|------------------------|------------------------|-------------------------|-------------------------|
|                  | Frequency<br>(cm <sup>-1</sup> ) | 100 fs<br>$\Delta$ mOD | 200 fs<br>$\Delta$ mOD | 500 fs<br>$\Delta$ mOD | 1000 fs<br>$\Delta$ mOD | 5000 fs<br>$\Delta$ mOD | 10000 fs<br>$\Delta$ mOD | 100 fs<br>$\Delta$ mOD | 200 fs<br>$\Delta$ mOD | 500 fs<br>$\Delta$ mOD | 1000 fs<br>$\Delta$ mOD | 5000 fs<br>$\Delta$ mOD |
| 1245             | 0.73149                          | 0.36241                | 0.35037                | 0.29591                | 0.33369                 | 0.37506                 | 0.37401                  | 0.17944                | 0.25708                | 0.21260                | 0.23834                 | 0.18249                 |
| 1246             | 0.74058                          | 0.35765                | 0.31287                | 0.32819                | 0.31946                 | 0.36138                 | 0.38144                  | 0.16978                | 0.26167                | 0.24137                | 0.22255                 | 0.18168                 |
| 1247             | 0.75730                          | 0.32750                | 0.33278                | 0.31208                | 0.30448                 | 0.36341                 | 0.37693                  | 0.17762                | 0.28577                | 0.23901                | 0.21244                 | 0.19309                 |
| 1248             | 0.75585                          | 0.30284                | 0.38334                | 0.30460                | 0.29240                 | 0.37648                 | 0.34978                  | 0.19779                | 0.28905                | 0.23084                | 0.22088                 | 0.20400                 |
| 1249             | 0.74445                          | 0.30702                | 0.41775                | 0.32062                | 0.28794                 | 0.38195                 | 0.32117                  | 0.21426                | 0.26576                | 0.23228                | 0.23497                 | 0.20394                 |
| 1250             | 0.77553                          | 0.34427                | 0.37786                | 0.31060                | 0.29321                 | 0.35063                 | 0.34895                  | 0.20244                | 0.26257                | 0.24194                | 0.21190                 | 0.18918                 |
| 1251             | 0.82255                          | 0.38192                | 0.32924                | 0.27495                | 0.29109                 | 0.32455                 | 0.39519                  | 0.19039                | 0.28389                | 0.25553                | 0.18454                 | 0.17360                 |
| 1252             | 0.82779                          | 0.38196                | 0.35708                | 0.25236                | 0.27447                 | 0.35192                 | 0.39984                  | 0.21094                | 0.30274                | 0.26398                | 0.20195                 | 0.17433                 |
| 1253             | 0.80022                          | 0.35302                | 0.38417                | 0.27542                | 0.29047                 | 0.37250                 | 0.41535                  | 0.21863                | 0.29779                | 0.24907                | 0.21975                 | 0.18655                 |
| 1254             | 0.76600                          | 0.32214                | 0.38036                | 0.30495                | 0.31785                 | 0.34867                 | 0.43287                  | 0.20496                | 0.28211                | 0.22910                | 0.22910                 | 0.18315                 |
| 1255             | 0.75181                          | 0.31413                | 0.36850                | 0.28582                | 0.30461                 | 0.29385                 | 0.40904                  | 0.19487                | 0.27661                | 0.23197                | 0.24417                 | 0.15127                 |
| 1256             | 0.76944                          | 0.32176                | 0.36190                | 0.27441                | 0.28266                 | 0.28023                 | 0.37940                  | 0.19924                | 0.25204                | 0.22883                | 0.23386                 | 0.16054                 |
| 1257             | 0.78213                          | 0.32713                | 0.35534                | 0.27664                | 0.27369                 | 0.30701                 | 0.37382                  | 0.20705                | 0.23236                | 0.21877                | 0.20485                 | 0.20076                 |
| 1258             | 0.75120                          | 0.31805                | 0.33984                | 0.25679                | 0.27389                 | 0.32137                 | 0.39434                  | 0.20082                | 0.26390                | 0.22396                | 0.19302                 | 0.20170                 |
| 1259             | 0.76780                          | 0.31606                | 0.34232                | 0.25176                | 0.27166                 | 0.34258                 | 0.40957                  | 0.19769                | 0.28044                | 0.22886                | 0.19433                 | 0.17471                 |
| 1260             | 0.82617                          | 0.32921                | 0.36183                | 0.26641                | 0.27963                 | 0.36192                 | 0.40054                  | 0.19999                | 0.26374                | 0.22541                | 0.19213                 | 0.14687                 |
| 1261             | 0.82978                          | 0.34480                | 0.36924                | 0.26879                | 0.31637                 | 0.34581                 | 0.37519                  | 0.19368                | 0.25690                | 0.22022                | 0.17565                 | 0.13592                 |
| 1262             | 0.82331                          | 0.35054                | 0.36614                | 0.27366                | 0.32073                 | 0.34023                 | 0.37104                  | 0.18999                | 0.25554                | 0.21450                | 0.17151                 | 0.13457                 |
| 1263             | 0.82990                          | 0.33929                | 0.35878                | 0.27348                | 0.29388                 | 0.35009                 | 0.38961                  | 0.19415                | 0.24842                | 0.21315                | 0.18408                 | 0.14118                 |
| 1264             | 0.81787                          | 0.31683                | 0.35070                | 0.23948                | 0.30707                 | 0.32755                 | 0.39277                  | 0.19668                | 0.23691                | 0.22240                | 0.18814                 | 0.16104                 |
| 1265             | 0.81849                          | 0.32488                | 0.35312                | 0.23252                | 0.31392                 | 0.31137                 | 0.38908                  | 0.18834                | 0.24722                | 0.22602                | 0.19056                 | 0.16653                 |
| 1266             | 0.83248                          | 0.36308                | 0.36323                | 0.27318                | 0.28917                 | 0.32268                 | 0.38982                  | 0.17808                | 0.27024                | 0.21521                | 0.19624                 | 0.15196                 |
| 1267             | 0.81061                          | 0.37386                | 0.36275                | 0.29990                | 0.27849                 | 0.33066                 | 0.39160                  | 0.18991                | 0.25709                | 0.20199                | 0.19629                 | 0.14807                 |
| 1268             | 0.79400                          | 0.36367                | 0.36554                | 0.28715                | 0.29739                 | 0.34329                 | 0.39881                  | 0.20211                | 0.24673                | 0.20966                | 0.19510                 | 0.15592                 |
| 1269             | 0.80919                          | 0.35579                | 0.37520                | 0.25971                | 0.32455                 | 0.36074                 | 0.40734                  | 0.19808                | 0.26030                | 0.23421                | 0.19409                 | 0.16427                 |
| 1270             | 0.81702                          | 0.35691                | 0.36868                | 0.27886                | 0.31382                 | 0.35523                 | 0.40062                  | 0.19306                | 0.25419                | 0.23440                | 0.18548                 | 0.16396                 |
| 1271             | 0.81943                          | 0.33998                | 0.36528                | 0.30162                | 0.29198                 | 0.33993                 | 0.39464                  | 0.19697                | 0.25258                | 0.22630                | 0.18012                 | 0.16625                 |
| 1272             | 0.82075                          | 0.30571                | 0.37984                | 0.28959                | 0.29334                 | 0.33819                 | 0.40287                  | 0.20595                | 0.27103                | 0.22906                | 0.18764                 | 0.17703                 |
| 1273             | 0.80229                          | 0.31523                | 0.38874                | 0.28381                | 0.31057                 | 0.35491                 | 0.41039                  | 0.20206                | 0.26596                | 0.22603                | 0.20092                 | 0.18142                 |
| 1274             | 0.79448                          | 0.35168                | 0.37531                | 0.28582                | 0.32823                 | 0.35694                 | 0.40138                  | 0.19562                | 0.25505                | 0.21704                | 0.20674                 | 0.18661                 |
| 1275             | 0.81744                          | 0.37141                | 0.35036                | 0.28524                | 0.33403                 | 0.32941                 | 0.37769                  | 0.19681                | 0.26394                | 0.21170                | 0.20265                 | 0.19796                 |
| 1276             | 0.82584                          | 0.36179                | 0.36009                | 0.29140                | 0.32711                 | 0.32267                 | 0.37027                  | 0.18951                | 0.27052                | 0.21690                | 0.20769                 | 0.19685                 |
| 1277             | 0.80696                          | 0.34428                | 0.37717                | 0.29510                | 0.32080                 | 0.34166                 | 0.37599                  | 0.17959                | 0.25555                | 0.21464                | 0.20594                 | 0.18826                 |
| 1278             | 0.78109                          | 0.34352                | 0.36827                | 0.29484                | 0.32777                 | 0.36351                 | 0.37456                  | 0.17799                | 0.22167                | 0.19439                | 0.18779                 | 0.18630                 |
| 1279             | 0.78759                          | 0.35329                | 0.37938                | 0.32625                | 0.34289                 | 0.37201                 | 0.35675                  | 0.17591                | 0.20725                | 0.19026                | 0.19947                 | 0.19156                 |
| 1280             | 0.81574                          | 0.37061                | 0.39828                | 0.34968                | 0.35857                 | 0.37773                 | 0.33932                  | 0.16929                | 0.21845                | 0.20094                | 0.22266                 | 0.19492                 |
| 1281             | 0.82785                          | 0.39242                | 0.39248                | 0.32094                | 0.37070                 | 0.39511                 | 0.33874                  | 0.16125                | 0.23509                | 0.20402                | 0.21577                 | 0.19085                 |

|      |         |         |         |         |         |         |         |         |         |         |         |         |
|------|---------|---------|---------|---------|---------|---------|---------|---------|---------|---------|---------|---------|
| 1282 | 0.80858 | 0.40412 | 0.39159 | 0.31439 | 0.38373 | 0.40715 | 0.33157 | 0.15976 | 0.23246 | 0.19337 | 0.19824 | 0.19466 |
| 1283 | 0.80160 | 0.40859 | 0.40605 | 0.34207 | 0.39735 | 0.42040 | 0.31717 | 0.15716 | 0.21046 | 0.18102 | 0.19374 | 0.19694 |
| 1284 | 0.84833 | 0.41696 | 0.42430 | 0.36377 | 0.40602 | 0.44556 | 0.31029 | 0.14266 | 0.18673 | 0.17938 | 0.20632 | 0.18322 |
| 1285 | 0.86468 | 0.42253 | 0.43492 | 0.36565 | 0.40396 | 0.44484 | 0.30647 | 0.13194 | 0.17529 | 0.16904 | 0.19649 | 0.18428 |
| 1286 | 0.84524 | 0.43016 | 0.44323 | 0.36862 | 0.41518 | 0.43254 | 0.29824 | 0.12779 | 0.17649 | 0.15886 | 0.17361 | 0.19259 |
| 1287 | 0.85043 | 0.45073 | 0.46107 | 0.39754 | 0.46401 | 0.45680 | 0.28222 | 0.11947 | 0.17902 | 0.16831 | 0.17600 | 0.17876 |
| 1288 | 0.86643 | 0.47195 | 0.47479 | 0.40638 | 0.48955 | 0.50098 | 0.26684 | 0.10321 | 0.16992 | 0.15436 | 0.17493 | 0.17501 |
| 1289 | 0.87604 | 0.48385 | 0.49183 | 0.41697 | 0.48317 | 0.52503 | 0.25401 | 0.09801 | 0.15640 | 0.12963 | 0.16584 | 0.17727 |
| 1290 | 0.87476 | 0.48418 | 0.52780 | 0.48561 | 0.49129 | 0.50240 | 0.23768 | 0.12316 | 0.15514 | 0.14690 | 0.17151 | 0.15009 |
| 1291 | 0.85673 | 0.47330 | 0.52739 | 0.48129 | 0.50299 | 0.49502 | 0.21617 | 0.11721 | 0.14161 | 0.14868 | 0.17122 | 0.12873 |
| 1292 | 0.84993 | 0.47644 | 0.49845 | 0.41136 | 0.51103 | 0.52616 | 0.20879 | 0.08314 | 0.12895 | 0.12738 | 0.16153 | 0.13527 |
| 1293 | 0.89610 | 0.52492 | 0.51555 | 0.43837 | 0.52554 | 0.55485 | 0.24219 | 0.09547 | 0.16324 | 0.14360 | 0.16582 | 0.15727 |
| 1294 | 0.92205 | 0.55115 | 0.53882 | 0.47281 | 0.53798 | 0.56041 | 0.27352 | 0.11742 | 0.19138 | 0.16407 | 0.18166 | 0.18676 |
| 1295 | 0.90200 | 0.53515 | 0.53942 | 0.45677 | 0.54379 | 0.55322 | 0.27719 | 0.12043 | 0.19061 | 0.16648 | 0.20383 | 0.21646 |
| 1296 | 0.90216 | 0.54250 | 0.54296 | 0.45962 | 0.54938 | 0.56510 | 0.27647 | 0.12932 | 0.20617 | 0.17673 | 0.23328 | 0.24040 |
| 1297 | 0.91620 | 0.56435 | 0.54539 | 0.47381 | 0.55215 | 0.57863 | 0.29333 | 0.15895 | 0.22906 | 0.20163 | 0.26569 | 0.26895 |
| 1298 | 0.91823 | 0.57417 | 0.54326 | 0.47448 | 0.55165 | 0.57237 | 0.32525 | 0.20237 | 0.24936 | 0.23544 | 0.29548 | 0.30678 |
| 1299 | 0.89941 | 0.56499 | 0.54706 | 0.45964 | 0.55257 | 0.54882 | 0.34351 | 0.23183 | 0.28093 | 0.26719 | 0.32037 | 0.34317 |
| 1300 | 0.88312 | 0.55452 | 0.54027 | 0.45266 | 0.53925 | 0.53491 | 0.36568 | 0.24623 | 0.30279 | 0.29618 | 0.35217 | 0.37614 |
| 1301 | 0.88207 | 0.55504 | 0.52191 | 0.46108 | 0.51164 | 0.54077 | 0.40707 | 0.26222 | 0.31308 | 0.32710 | 0.39832 | 0.41328 |
| 1302 | 0.87289 | 0.55452 | 0.52814 | 0.45422 | 0.50368 | 0.53636 | 0.44669 | 0.30119 | 0.35713 | 0.36418 | 0.44800 | 0.46688 |
| 1303 | 0.85462 | 0.54562 | 0.53192 | 0.43575 | 0.50029 | 0.51715 | 0.46995 | 0.34315 | 0.40302 | 0.39544 | 0.47946 | 0.51467 |
| 1304 | 0.83533 | 0.52951 | 0.50616 | 0.42028 | 0.48144 | 0.49235 | 0.48090 | 0.36658 | 0.41681 | 0.41545 | 0.49029 | 0.54078 |
| 1305 | 0.81719 | 0.51679 | 0.48232 | 0.40802 | 0.46379 | 0.47052 | 0.50589 | 0.38463 | 0.43321 | 0.44325 | 0.51837 | 0.57048 |
| 1306 | 0.80609 | 0.51404 | 0.46781 | 0.39490 | 0.44885 | 0.45983 | 0.53127 | 0.40399 | 0.46432 | 0.47202 | 0.55490 | 0.60005 |
| 1307 | 0.79952 | 0.51415 | 0.45536 | 0.38085 | 0.42976 | 0.45207 | 0.53969 | 0.42629 | 0.49792 | 0.48793 | 0.57754 | 0.61831 |
| 1308 | 0.77463 | 0.48989 | 0.44301 | 0.37605 | 0.40555 | 0.40955 | 0.55494 | 0.45324 | 0.50880 | 0.49680 | 0.59567 | 0.63728 |
| 1309 | 0.74608 | 0.45864 | 0.43231 | 0.36985 | 0.38397 | 0.36407 | 0.57511 | 0.47140 | 0.51063 | 0.50764 | 0.60910 | 0.65395 |
| 1310 | 0.73272 | 0.44860 | 0.42322 | 0.34545 | 0.37090 | 0.36023 | 0.58679 | 0.47095 | 0.52481 | 0.52334 | 0.61398 | 0.65854 |
| 1311 | 0.70207 | 0.43991 | 0.40779 | 0.30772 | 0.35509 | 0.35819 | 0.59704 | 0.47460 | 0.52841 | 0.53106 | 0.61864 | 0.65335 |
| 1312 | 0.66528 | 0.42733 | 0.38476 | 0.28216 | 0.33362 | 0.34266 | 0.60095 | 0.48619 | 0.52172 | 0.52776 | 0.62014 | 0.64277 |
| 1313 | 0.65227 | 0.41621 | 0.36077 | 0.28525 | 0.31124 | 0.32335 | 0.59253 | 0.49422 | 0.52093 | 0.52158 | 0.60997 | 0.63187 |
| 1314 | 0.63799 | 0.39652 | 0.34775 | 0.27241 | 0.29158 | 0.30185 | 0.59375 | 0.49392 | 0.52377 | 0.52571 | 0.59213 | 0.62672 |
| 1315 | 0.61538 | 0.38042 | 0.34232 | 0.24262 | 0.27500 | 0.27895 | 0.59488 | 0.48767 | 0.52309 | 0.52918 | 0.57712 | 0.61819 |
| 1316 | 0.59692 | 0.38515 | 0.33203 | 0.22922 | 0.26074 | 0.25752 | 0.57277 | 0.48036 | 0.51517 | 0.51147 | 0.57179 | 0.59373 |
| 1317 | 0.58115 | 0.37504 | 0.31974 | 0.22613 | 0.25242 | 0.24455 | 0.56262 | 0.46955 | 0.51117 | 0.49103 | 0.55932 | 0.57255 |
| 1318 | 0.56683 | 0.34951 | 0.30786 | 0.21972 | 0.24434 | 0.23653 | 0.56915 | 0.46219 | 0.51135 | 0.48329 | 0.53948 | 0.55986 |
| 1319 | 0.55456 | 0.34072 | 0.29610 | 0.20370 | 0.22737 | 0.22301 | 0.56433 | 0.46932 | 0.50569 | 0.48842 | 0.52840 | 0.54552 |
| 1320 | 0.53950 | 0.33380 | 0.28816 | 0.19569 | 0.21780 | 0.20925 | 0.55487 | 0.47630 | 0.49726 | 0.49004 | 0.52431 | 0.53778 |
| 1321 | 0.52664 | 0.32485 | 0.28494 | 0.19931 | 0.21875 | 0.19951 | 0.55178 | 0.47845 | 0.49462 | 0.48620 | 0.52207 | 0.53591 |
| 1322 | 0.52671 | 0.32944 | 0.28268 | 0.19880 | 0.21544 | 0.19325 | 0.55909 | 0.48593 | 0.50444 | 0.49149 | 0.52022 | 0.52876 |
| 1323 | 0.52026 | 0.33490 | 0.27615 | 0.19035 | 0.20970 | 0.19375 | 0.57315 | 0.49363 | 0.51438 | 0.50311 | 0.52701 | 0.52711 |
| 1324 | 0.50134 | 0.33353 | 0.26937 | 0.18412 | 0.20852 | 0.19935 | 0.58709 | 0.49892 | 0.52110 | 0.51466 | 0.53910 | 0.53519 |

|                     |         |         |         |         |         |         |         |         |         |         |         |         |
|---------------------|---------|---------|---------|---------|---------|---------|---------|---------|---------|---------|---------|---------|
| 1325                | 0.49024 | 0.33382 | 0.27501 | 0.19666 | 0.21647 | 0.20357 | 0.59380 | 0.50706 | 0.53469 | 0.52238 | 0.54011 | 0.54249 |
| 1326                | 0.49637 | 0.33888 | 0.28698 | 0.21045 | 0.22544 | 0.21471 | 0.59202 | 0.51677 | 0.53893 | 0.52427 | 0.54084 | 0.54799 |
| 1327                | 0.50907 | 0.34977 | 0.29572 | 0.21426 | 0.23421 | 0.23077 | 0.59161 | 0.52948 | 0.53470 | 0.52556 | 0.55171 | 0.55731 |
| 1328                | 0.50242 | 0.36634 | 0.29847 | 0.22096 | 0.25331 | 0.23355 | 0.60903 | 0.55030 | 0.55218 | 0.53751 | 0.56724 | 0.57606 |
| 1329                | 0.49667 | 0.37898 | 0.30572 | 0.22950 | 0.26522 | 0.24427 | 0.61920 | 0.56026 | 0.56494 | 0.54840 | 0.57320 | 0.58336 |
| 1330                | 0.50864 | 0.38305 | 0.32305 | 0.24018 | 0.26756 | 0.27225 | 0.60915 | 0.55182 | 0.55615 | 0.54879 | 0.56709 | 0.57377 |
| 1331                | 0.51925 | 0.38769 | 0.33973 | 0.26234 | 0.29446 | 0.28522 | 0.60903 | 0.54929 | 0.55812 | 0.54774 | 0.56720 | 0.57866 |
| 1332                | 0.51860 | 0.39748 | 0.34569 | 0.27735 | 0.32316 | 0.28747 | 0.61363 | 0.55367 | 0.56091 | 0.54821 | 0.56518 | 0.58162 |
| 1333                | 0.51119 | 0.41005 | 0.34479 | 0.27526 | 0.32875 | 0.29638 | 0.60886 | 0.55804 | 0.55162 | 0.54956 | 0.55578 | 0.56674 |
| 1334                | 0.51502 | 0.41632 | 0.36066 | 0.28422 | 0.33402 | 0.31676 | 0.59883 | 0.56236 | 0.54976 | 0.55086 | 0.56002 | 0.56073 |
| 1335                | 0.52513 | 0.41912 | 0.37650 | 0.29851 | 0.34789 | 0.33986 | 0.58923 | 0.55306 | 0.54351 | 0.54617 | 0.55477 | 0.55782 |
| 1336                | 0.52868 | 0.42457 | 0.37117 | 0.30182 | 0.36352 | 0.35388 | 0.58163 | 0.52638 | 0.51976 | 0.53076 | 0.52025 | 0.54083 |
| 1337                | 0.52509 | 0.43145 | 0.36419 | 0.30012 | 0.36551 | 0.35576 | 0.56933 | 0.51287 | 0.50179 | 0.50830 | 0.49548 | 0.51244 |
| 1338                | 0.52102 | 0.44216 | 0.37397 | 0.30509 | 0.37137 | 0.35566 | 0.54803 | 0.50387 | 0.49253 | 0.48275 | 0.48013 | 0.48419 |
| 1339                | 0.52126 | 0.45615 | 0.39745 | 0.31939 | 0.39698 | 0.36422 | 0.52015 | 0.47887 | 0.47967 | 0.45690 | 0.45505 | 0.46341 |
| 1340                | 0.51786 | 0.45985 | 0.39249 | 0.32077 | 0.40425 | 0.37461 | 0.49867 | 0.45514 | 0.45359 | 0.43182 | 0.42735 | 0.43793 |
| 1341                | 0.50781 | 0.45846 | 0.37888 | 0.31340 | 0.39536 | 0.38237 | 0.48312 | 0.43709 | 0.42410 | 0.40846 | 0.40118 | 0.40538 |
| 1342                | 0.49422 | 0.46528 | 0.39133 | 0.31100 | 0.39430 | 0.38395 | 0.46145 | 0.41954 | 0.40275 | 0.38953 | 0.37358 | 0.37135 |
| 1343                | 0.48284 | 0.47316 | 0.37124 | 0.29435 | 0.38776 | 0.36929 | 0.42162 | 0.40750 | 0.36829 | 0.38115 | 0.33705 | 0.33801 |
| 1344                | 0.47032 | 0.46609 | 0.33424 | 0.28025 | 0.37192 | 0.35460 | 0.38841 | 0.39257 | 0.32990 | 0.36577 | 0.30237 | 0.30714 |
| 1345                | 0.45281 | 0.43785 | 0.34209 | 0.29692 | 0.35702 | 0.36217 | 0.39163 | 0.36244 | 0.31411 | 0.32317 | 0.28589 | 0.28099 |
| 1346                | 0.44964 | 0.42765 | 0.35933 | 0.29625 | 0.35438 | 0.36001 | 0.37853 | 0.33391 | 0.30577 | 0.29014 | 0.27054 | 0.26205 |
| 1347                | 0.44761 | 0.43596 | 0.35257 | 0.27182 | 0.35454 | 0.33900 | 0.34669 | 0.31998 | 0.29483 | 0.27731 | 0.24931 | 0.24371 |
| 1348                | 0.41655 | 0.42853 | 0.32169 | 0.25927 | 0.33723 | 0.32017 | 0.33822 | 0.31922 | 0.28402 | 0.26463 | 0.22913 | 0.21664 |
| 1349                | 0.39700 | 0.41282 | 0.30988 | 0.24570 | 0.31691 | 0.31481 | 0.32039 | 0.31094 | 0.27352 | 0.25301 | 0.20779 | 0.19441 |
| 1350                | 0.39415 | 0.39775 | 0.31726 | 0.22721 | 0.30054 | 0.31362 | 0.29074 | 0.29142 | 0.26043 | 0.23847 | 0.18839 | 0.18204 |
| <grating<br>change> |         |         |         |         |         |         |         |         |         |         |         |         |
| 1355                | 0.30852 | 0.34534 | 0.28143 | 0.26111 | 0.20148 | 0.13528 | 0.21163 | 0.17493 | 0.20625 | 0.17600 | 0.13358 | 0.09329 |
| 1356                | 0.31028 | 0.34302 | 0.27628 | 0.25057 | 0.18875 | 0.13541 | 0.22027 | 0.18008 | 0.21710 | 0.18891 | 0.13994 | 0.08994 |
| 1357                | 0.30417 | 0.33999 | 0.26414 | 0.24226 | 0.19238 | 0.13200 | 0.22348 | 0.19108 | 0.22675 | 0.20178 | 0.14191 | 0.09947 |
| 1358                | 0.28895 | 0.33493 | 0.25309 | 0.23976 | 0.20134 | 0.13055 | 0.22338 | 0.20342 | 0.23410 | 0.21004 | 0.14344 | 0.12005 |
| 1359                | 0.27209 | 0.32524 | 0.25322 | 0.24322 | 0.19561 | 0.13953 | 0.22623 | 0.21383 | 0.23980 | 0.21516 | 0.15420 | 0.13641 |
| 1360                | 0.26060 | 0.31889 | 0.25434 | 0.24704 | 0.18992 | 0.14457 | 0.23441 | 0.22147 | 0.24354 | 0.22167 | 0.16679 | 0.14294 |
| 1361                | 0.25578 | 0.32014 | 0.24756 | 0.24560 | 0.19684 | 0.13676 | 0.24705 | 0.22653 | 0.24654 | 0.23197 | 0.17335 | 0.13973 |
| 1362                | 0.24651 | 0.31760 | 0.24089 | 0.23734 | 0.20001 | 0.13531 | 0.25868 | 0.22994 | 0.25421 | 0.24152 | 0.17695 | 0.13317 |
| 1363                | 0.23091 | 0.30921 | 0.23849 | 0.22191 | 0.19629 | 0.14332 | 0.26834 | 0.23590 | 0.26743 | 0.24770 | 0.18167 | 0.13132 |
| 1364                | 0.21917 | 0.30500 | 0.23718 | 0.20118 | 0.20111 | 0.14252 | 0.28073 | 0.25152 | 0.28137 | 0.25136 | 0.19071 | 0.14222 |
| 1365                | 0.21212 | 0.29938 | 0.23467 | 0.19199 | 0.20949 | 0.13866 | 0.29580 | 0.27489 | 0.29487 | 0.25504 | 0.20492 | 0.16309 |
| 1366                | 0.20509 | 0.28233 | 0.23084 | 0.21206 | 0.20837 | 0.14703 | 0.31085 | 0.29795 | 0.30933 | 0.26250 | 0.22214 | 0.18472 |
| 1367                | 0.19642 | 0.27082 | 0.23239 | 0.23946 | 0.20913 | 0.15418 | 0.32568 | 0.31033 | 0.32683 | 0.27920 | 0.23272 | 0.19868 |
| 1368                | 0.18890 | 0.27651 | 0.24081 | 0.24967 | 0.22058 | 0.15135 | 0.33957 | 0.31056 | 0.34371 | 0.30489 | 0.23289 | 0.20236 |
| 1369                | 0.19293 | 0.28045 | 0.24139 | 0.24007 | 0.22875 | 0.15978 | 0.34913 | 0.31882 | 0.34350 | 0.32539 | 0.23721 | 0.20579 |

|      |          |          |          |          |          |          |         |         |         |         |         |         |
|------|----------|----------|----------|----------|----------|----------|---------|---------|---------|---------|---------|---------|
| 1370 | 0.20411  | 0.27601  | 0.22987  | 0.22141  | 0.22744  | 0.18108  | 0.35670 | 0.33961 | 0.33398 | 0.33724 | 0.24960 | 0.21278 |
| 1371 | 0.20170  | 0.27521  | 0.21707  | 0.21469  | 0.22313  | 0.19091  | 0.37075 | 0.35642 | 0.34979 | 0.35078 | 0.25957 | 0.21829 |
| 1372 | 0.18966  | 0.28048  | 0.21431  | 0.22191  | 0.21999  | 0.18720  | 0.38812 | 0.36251 | 0.38568 | 0.36464 | 0.26843 | 0.22164 |
| 1373 | 0.18398  | 0.28768  | 0.22609  | 0.23296  | 0.21902  | 0.18183  | 0.40119 | 0.36145 | 0.41322 | 0.37196 | 0.28282 | 0.22541 |
| 1374 | 0.18334  | 0.29206  | 0.22524  | 0.23687  | 0.21482  | 0.18432  | 0.41621 | 0.37414 | 0.41412 | 0.37623 | 0.29796 | 0.23340 |
| 1375 | 0.18523  | 0.28842  | 0.19980  | 0.22991  | 0.20846  | 0.19357  | 0.43377 | 0.40584 | 0.39152 | 0.38100 | 0.30865 | 0.24622 |
| 1376 | 0.19583  | 0.27130  | 0.19306  | 0.22506  | 0.21914  | 0.18709  | 0.43294 | 0.41524 | 0.38943 | 0.38292 | 0.31623 | 0.25645 |
| 1377 | 0.20368  | 0.25058  | 0.20566  | 0.22615  | 0.23160  | 0.17534  | 0.42442 | 0.39590 | 0.41521 | 0.38862 | 0.31251 | 0.26226 |
| 1378 | 0.17977  | 0.25090  | 0.18584  | 0.22405  | 0.19492  | 0.20290  | 0.45228 | 0.38682 | 0.42980 | 0.41368 | 0.28163 | 0.26908 |
| 1379 | 0.14454  | 0.26286  | 0.15217  | 0.21460  | 0.13979  | 0.22968  | 0.48348 | 0.39442 | 0.42783 | 0.43251 | 0.25763 | 0.27661 |
| 1380 | 0.13782  | 0.26217  | 0.15302  | 0.19985  | 0.13137  | 0.18861  | 0.45994 | 0.40366 | 0.42353 | 0.41003 | 0.28688 | 0.28255 |
| 1381 | 0.14555  | 0.25479  | 0.16575  | 0.19486  | 0.15613  | 0.13580  | 0.43404 | 0.39910 | 0.41929 | 0.38677 | 0.32834 | 0.29300 |
| 1382 | 0.14693  | 0.25175  | 0.16372  | 0.20502  | 0.17960  | 0.12721  | 0.44972 | 0.37843 | 0.41464 | 0.39530 | 0.34241 | 0.30902 |
| 1383 | 0.14301  | 0.25447  | 0.15981  | 0.20532  | 0.17480  | 0.13389  | 0.45689 | 0.36868 | 0.41081 | 0.39891 | 0.35207 | 0.31489 |
| 1384 | 0.13622  | 0.25459  | 0.15909  | 0.19152  | 0.14505  | 0.13066  | 0.43991 | 0.37353 | 0.40678 | 0.38561 | 0.36092 | 0.31133 |
| 1385 | 0.12697  | 0.23660  | 0.15262  | 0.18633  | 0.12491  | 0.11224  | 0.43512 | 0.36746 | 0.39938 | 0.38110 | 0.34371 | 0.31854 |
| 1386 | 0.11518  | 0.21484  | 0.14872  | 0.18840  | 0.11817  | 0.09078  | 0.44048 | 0.35487 | 0.39327 | 0.38348 | 0.31825 | 0.33077 |
| 1387 | 0.10091  | 0.21353  | 0.15777  | 0.18382  | 0.11167  | 0.08248  | 0.43339 | 0.35291 | 0.39402 | 0.37795 | 0.31916 | 0.33107 |
| 1388 | 0.08644  | 0.21700  | 0.14810  | 0.17271  | 0.10565  | 0.07551  | 0.41297 | 0.34821 | 0.38872 | 0.37379 | 0.33184 | 0.32711 |
| 1389 | 0.07439  | 0.21011  | 0.10733  | 0.15986  | 0.10298  | 0.06093  | 0.38988 | 0.32980 | 0.37092 | 0.37593 | 0.33537 | 0.32803 |
| 1390 | 0.06640  | 0.20597  | 0.09425  | 0.15088  | 0.10321  | 0.05497  | 0.38527 | 0.31274 | 0.36112 | 0.36368 | 0.32856 | 0.32937 |
| 1391 | 0.05850  | 0.20537  | 0.11858  | 0.14799  | 0.10243  | 0.05672  | 0.39729 | 0.30405 | 0.36342 | 0.33866 | 0.31902 | 0.32475 |
| 1392 | 0.04175  | 0.19262  | 0.12628  | 0.14888  | 0.09452  | 0.04418  | 0.39801 | 0.29768 | 0.36039 | 0.32968 | 0.31985 | 0.30983 |
| 1393 | 0.02311  | 0.17744  | 0.11475  | 0.14649  | 0.08687  | 0.02599  | 0.38560 | 0.29374 | 0.35448 | 0.33399 | 0.32666 | 0.30197 |
| 1394 | 0.01506  | 0.17838  | 0.10916  | 0.13446  | 0.08991  | 0.02353  | 0.37264 | 0.29428 | 0.35624 | 0.33311 | 0.32691 | 0.32116 |
| 1395 | 0.00986  | 0.18020  | 0.10869  | 0.12256  | 0.08929  | 0.02722  | 0.36073 | 0.29089 | 0.35420 | 0.32906 | 0.32040 | 0.33771 |
| 1396 | 0.00060  | 0.17004  | 0.10669  | 0.12023  | 0.07626  | 0.02622  | 0.35000 | 0.27922 | 0.34108 | 0.32673 | 0.31177 | 0.32822 |
| 1397 | -0.00446 | 0.16302  | 0.10116  | 0.12498  | 0.07118  | 0.02768  | 0.34461 | 0.27104 | 0.33376 | 0.32347 | 0.30810 | 0.31688 |
| 1398 | -0.00698 | 0.16171  | 0.09080  | 0.12776  | 0.07599  | 0.03014  | 0.34547 | 0.27014 | 0.33682 | 0.31903 | 0.31187 | 0.31559 |
| 1399 | -0.02084 | 0.15129  | 0.07491  | 0.11577  | 0.06914  | 0.02086  | 0.34871 | 0.26870 | 0.33768 | 0.31651 | 0.31957 | 0.31503 |
| 1400 | -0.04035 | 0.13500  | 0.05871  | 0.09648  | 0.05565  | 0.00374  | 0.34686 | 0.26190 | 0.33354 | 0.31230 | 0.32441 | 0.31285 |
| 1401 | -0.05243 | 0.12422  | 0.04888  | 0.08521  | 0.05115  | -0.00958 | 0.33372 | 0.24853 | 0.32698 | 0.30072 | 0.31961 | 0.31038 |
| 1402 | -0.06676 | 0.11473  | 0.04205  | 0.07633  | 0.04220  | -0.02046 | 0.31868 | 0.23397 | 0.31528 | 0.28601 | 0.30660 | 0.30316 |
| 1403 | -0.09037 | 0.10131  | 0.03331  | 0.06193  | 0.01901  | -0.03279 | 0.30801 | 0.22127 | 0.29797 | 0.27251 | 0.28854 | 0.28903 |
| 1404 | -0.10932 | 0.08699  | 0.02113  | 0.04321  | -0.00058 | -0.04736 | 0.29066 | 0.20407 | 0.28304 | 0.25810 | 0.26702 | 0.27482 |
| 1405 | -0.12097 | 0.07181  | 0.00516  | 0.02253  | -0.01180 | -0.06319 | 0.26484 | 0.18256 | 0.26926 | 0.24114 | 0.24565 | 0.26054 |
| 1406 | -0.13781 | 0.05183  | -0.01382 | 0.00197  | -0.02795 | -0.07793 | 0.24119 | 0.16515 | 0.24507 | 0.22166 | 0.22956 | 0.23775 |
| 1407 | -0.15811 | 0.03085  | -0.03176 | -0.01674 | -0.04726 | -0.09159 | 0.21962 | 0.15061 | 0.21649 | 0.20023 | 0.21272 | 0.20807 |
| 1408 | -0.17421 | 0.01469  | -0.04468 | -0.03293 | -0.06150 | -0.10548 | 0.19443 | 0.13184 | 0.19567 | 0.17712 | 0.18597 | 0.17786 |
| 1409 | -0.19285 | -0.00396 | -0.05790 | -0.04970 | -0.07767 | -0.12018 | 0.16574 | 0.10260 | 0.17198 | 0.14978 | 0.15703 | 0.14612 |
| 1410 | -0.21908 | -0.03003 | -0.07669 | -0.06946 | -0.10062 | -0.13631 | 0.13632 | 0.06390 | 0.13794 | 0.11822 | 0.13246 | 0.11225 |
| 1411 | -0.24466 | -0.05441 | -0.09986 | -0.09053 | -0.12027 | -0.15482 | 0.11075 | 0.03196 | 0.10802 | 0.08983 | 0.10496 | 0.08132 |
| 1412 | -0.26584 | -0.07316 | -0.12266 | -0.11170 | -0.13341 | -0.17342 | 0.08811 | 0.01087 | 0.08504 | 0.06466 | 0.07308 | 0.05332 |

|      |          |          |          |          |          |          |          |          |          |          |          |          |
|------|----------|----------|----------|----------|----------|----------|----------|----------|----------|----------|----------|----------|
| 1413 | -0.28611 | -0.09034 | -0.13826 | -0.13279 | -0.14693 | -0.18680 | 0.06161  | -0.01087 | 0.05636  | 0.03420  | 0.04355  | 0.02226  |
| 1414 | -0.30834 | -0.10803 | -0.15146 | -0.15157 | -0.16522 | -0.19850 | 0.03269  | -0.03589 | 0.02392  | 0.00112  | 0.01510  | -0.00946 |
| 1415 | -0.33285 | -0.12686 | -0.17085 | -0.16549 | -0.18814 | -0.21431 | 0.00639  | -0.06170 | -0.00313 | -0.02647 | -0.01646 | -0.03590 |
| 1416 | -0.35099 | -0.14767 | -0.18962 | -0.17644 | -0.20249 | -0.22555 | -0.01947 | -0.08926 | -0.02539 | -0.04763 | -0.04517 | -0.05941 |
| 1417 | -0.35795 | -0.16738 | -0.20005 | -0.18567 | -0.20028 | -0.22694 | -0.04625 | -0.11718 | -0.04522 | -0.06460 | -0.06633 | -0.08204 |
| 1418 | -0.36338 | -0.17445 | -0.20264 | -0.19018 | -0.19371 | -0.23013 | -0.06884 | -0.13681 | -0.06249 | -0.08191 | -0.08487 | -0.09982 |
| 1419 | -0.37069 | -0.16922 | -0.19940 | -0.18875 | -0.19091 | -0.23630 | -0.08795 | -0.15093 | -0.08135 | -0.10260 | -0.10536 | -0.11614 |
| 1420 | -0.37398 | -0.16569 | -0.19268 | -0.18280 | -0.19170 | -0.23309 | -0.11128 | -0.17487 | -0.10969 | -0.12747 | -0.13009 | -0.14226 |
| 1421 | -0.36935 | -0.16383 | -0.18388 | -0.17267 | -0.19087 | -0.22123 | -0.13853 | -0.20654 | -0.13966 | -0.15515 | -0.15807 | -0.17411 |
| 1422 | -0.35595 | -0.15610 | -0.17337 | -0.15834 | -0.18183 | -0.20807 | -0.16522 | -0.23507 | -0.15916 | -0.18330 | -0.18682 | -0.20083 |
| 1423 | -0.34058 | -0.14115 | -0.15945 | -0.14148 | -0.16432 | -0.19347 | -0.19043 | -0.25942 | -0.18110 | -0.21073 | -0.21575 | -0.22411 |
| 1424 | -0.32766 | -0.12059 | -0.14063 | -0.12483 | -0.14294 | -0.17754 | -0.21618 | -0.28347 | -0.21581 | -0.23834 | -0.24514 | -0.24896 |
| 1425 | -0.31140 | -0.09845 | -0.11717 | -0.11208 | -0.12858 | -0.16565 | -0.24824 | -0.31521 | -0.25149 | -0.27075 | -0.27586 | -0.27934 |
| 1426 | -0.29005 | -0.07581 | -0.09158 | -0.09653 | -0.11581 | -0.15414 | -0.28275 | -0.35209 | -0.28127 | -0.30527 | -0.30536 | -0.31188 |
| 1427 | -0.26823 | -0.05057 | -0.06824 | -0.06240 | -0.08296 | -0.12982 | -0.30577 | -0.37998 | -0.30691 | -0.33124 | -0.32759 | -0.33597 |
| 1428 | -0.25246 | -0.02656 | -0.04751 | -0.02486 | -0.04361 | -0.09700 | -0.31956 | -0.39691 | -0.32474 | -0.34773 | -0.34170 | -0.35223 |
| 1429 | -0.24597 | -0.00937 | -0.02724 | -0.00865 | -0.02437 | -0.06873 | -0.33344 | -0.40757 | -0.33013 | -0.35862 | -0.34999 | -0.36616 |
| 1430 | -0.23245 | 0.00425  | -0.00501 | 0.00448  | -0.01236 | -0.04854 | -0.34312 | -0.41226 | -0.33022 | -0.36200 | -0.35435 | -0.37359 |
| 1431 | -0.20298 | 0.01848  | 0.01959  | 0.03173  | 0.00818  | -0.03401 | -0.34204 | -0.41019 | -0.32940 | -0.35696 | -0.35466 | -0.37007 |
| 1432 | -0.17755 | 0.03395  | 0.04235  | 0.05980  | 0.03325  | -0.01589 | -0.32775 | -0.40106 | -0.31838 | -0.34857 | -0.34671 | -0.35694 |
| 1433 | -0.16540 | 0.05314  | 0.06323  | 0.08034  | 0.05700  | 0.00724  | -0.30428 | -0.38489 | -0.29658 | -0.33695 | -0.32891 | -0.33706 |
| 1434 | -0.15909 | 0.07990  | 0.08675  | 0.09571  | 0.07531  | 0.02759  | -0.28118 | -0.36187 | -0.27429 | -0.31602 | -0.30327 | -0.31366 |
| 1435 | -0.15352 | 0.10420  | 0.10717  | 0.11152  | 0.09171  | 0.04629  | -0.25494 | -0.33050 | -0.24889 | -0.28372 | -0.27188 | -0.28472 |
| 1436 | -0.14571 | 0.11353  | 0.11676  | 0.13248  | 0.11155  | 0.06785  | -0.21729 | -0.28999 | -0.21249 | -0.24249 | -0.23603 | -0.24755 |
| 1437 | -0.13351 | 0.12242  | 0.12737  | 0.15177  | 0.12759  | 0.08658  | -0.17463 | -0.24731 | -0.17010 | -0.20346 | -0.19376 | -0.21065 |
| 1438 | -0.11648 | 0.14061  | 0.14697  | 0.16227  | 0.13848  | 0.09865  | -0.13376 | -0.20870 | -0.12658 | -0.16978 | -0.14672 | -0.17857 |
| 1439 | -0.09752 | 0.14996  | 0.16235  | 0.16394  | 0.16335  | 0.11101  | -0.09267 | -0.17356 | -0.07824 | -0.12193 | -0.10638 | -0.14012 |
| 1440 | -0.08166 | 0.14782  | 0.16943  | 0.16361  | 0.19585  | 0.12609  | -0.05053 | -0.13664 | -0.03008 | -0.06345 | -0.07413 | -0.09464 |
| 1441 | -0.07502 | 0.15166  | 0.17702  | 0.17322  | 0.20167  | 0.13945  | -0.00917 | -0.08987 | 0.00391  | -0.02425 | -0.03918 | -0.05479 |
| 1442 | -0.07450 | 0.16001  | 0.18579  | 0.18825  | 0.19123  | 0.14644  | 0.02891  | -0.03925 | 0.03301  | 0.00132  | -0.00075 | -0.02184 |
| 1443 | -0.07278 | 0.16306  | 0.19158  | 0.19683  | 0.19321  | 0.14442  | 0.06182  | 0.00263  | 0.07371  | 0.03515  | 0.03621  | 0.00908  |
| 1444 | -0.06861 | 0.16744  | 0.19241  | 0.19903  | 0.19383  | 0.13969  | 0.09170  | 0.03184  | 0.11051  | 0.07262  | 0.06914  | 0.03804  |
| 1445 | -0.06486 | 0.17532  | 0.18976  | 0.19574  | 0.18161  | 0.13722  | 0.12054  | 0.05118  | 0.13090  | 0.10365  | 0.09680  | 0.06410  |
| 1446 | -0.06945 | 0.16883  | 0.19098  | 0.18208  | 0.17719  | 0.13322  | 0.14734  | 0.07235  | 0.14935  | 0.12366  | 0.11925  | 0.08732  |
| 1447 | -0.08344 | 0.14685  | 0.19123  | 0.16149  | 0.18273  | 0.12677  | 0.16712  | 0.09471  | 0.16914  | 0.13534  | 0.13723  | 0.10600  |
| 1448 | -0.09940 | 0.12903  | 0.17343  | 0.14673  | 0.17674  | 0.12124  | 0.17246  | 0.10429  | 0.17842  | 0.14780  | 0.15218  | 0.11728  |
| 1449 | -0.11101 | 0.12122  | 0.14673  | 0.13971  | 0.16126  | 0.11622  | 0.17202  | 0.10811  | 0.18322  | 0.16048  | 0.16618  | 0.12792  |
| 1450 | -0.11588 | 0.11851  | 0.13180  | 0.13531  | 0.14958  | 0.10970  | 0.17966  | 0.12036  | 0.19594  | 0.16838  | 0.18029  | 0.14619  |
| 1451 | -0.12555 | 0.10704  | 0.12881  | 0.12675  | 0.13934  | 0.10330  | 0.18920  | 0.12923  | 0.20702  | 0.17332  | 0.18920  | 0.16072  |
| 1452 | -0.14708 | 0.08216  | 0.12915  | 0.11253  | 0.12794  | 0.09791  | 0.19227  | 0.12534  | 0.20697  | 0.17714  | 0.19038  | 0.16303  |
| 1453 | -0.16877 | 0.06476  | 0.11867  | 0.10355  | 0.12219  | 0.09055  | 0.18889  | 0.12126  | 0.20053  | 0.17752  | 0.19139  | 0.16362  |
| 1454 | -0.18011 | 0.06306  | 0.10213  | 0.10138  | 0.12143  | 0.08187  | 0.18478  | 0.12180  | 0.19475  | 0.17547  | 0.19612  | 0.16952  |
| 1455 | -0.17668 | 0.06660  | 0.10333  | 0.09650  | 0.11633  | 0.07687  | 0.18914  | 0.12057  | 0.19621  | 0.17606  | 0.20263  | 0.18037  |

|      |          |          |         |         |          |          |         |          |         |         |         |         |
|------|----------|----------|---------|---------|----------|----------|---------|----------|---------|---------|---------|---------|
| 1456 | -0.17342 | 0.06098  | 0.11227 | 0.09320 | 0.11075  | 0.07724  | 0.19392 | 0.12045  | 0.20331 | 0.18018 | 0.20771 | 0.18972 |
| 1457 | -0.18776 | 0.03754  | 0.10594 | 0.09984 | 0.11444  | 0.08250  | 0.18628 | 0.12690  | 0.20997 | 0.18590 | 0.20942 | 0.19164 |
| 1458 | -0.19688 | 0.02222  | 0.09586 | 0.10446 | 0.12743  | 0.09153  | 0.17873 | 0.13044  | 0.21169 | 0.19023 | 0.21445 | 0.19812 |
| 1459 | -0.18480 | 0.03497  | 0.09705 | 0.09864 | 0.14467  | 0.10342  | 0.18227 | 0.12595  | 0.20937 | 0.19176 | 0.22670 | 0.21661 |
| 1460 | -0.17581 | 0.06046  | 0.10978 | 0.09473 | 0.15657  | 0.11796  | 0.18838 | 0.12698  | 0.21427 | 0.19313 | 0.23857 | 0.23326 |
| 1461 | -0.17711 | 0.07890  | 0.12717 | 0.10345 | 0.16219  | 0.13140  | 0.19098 | 0.13295  | 0.22374 | 0.19430 | 0.24627 | 0.24222 |
| 1462 | -0.17239 | 0.07376  | 0.13726 | 0.12810 | 0.17004  | 0.13703  | 0.18980 | 0.12687  | 0.22013 | 0.19228 | 0.25208 | 0.24973 |
| 1463 | -0.16538 | 0.05810  | 0.13572 | 0.14630 | 0.17773  | 0.14010  | 0.18542 | 0.11752  | 0.20926 | 0.19074 | 0.25812 | 0.25928 |
| 1464 | -0.16794 | 0.05539  | 0.12560 | 0.13318 | 0.17901  | 0.14852  | 0.17949 | 0.12216  | 0.20726 | 0.19470 | 0.26498 | 0.27093 |
| 1465 | -0.17184 | 0.05778  | 0.12246 | 0.12048 | 0.18094  | 0.15002  | 0.17720 | 0.12506  | 0.21196 | 0.19702 | 0.26752 | 0.27795 |
| 1466 | -0.16606 | 0.05590  | 0.13728 | 0.13544 | 0.19056  | 0.14025  | 0.18009 | 0.11388  | 0.21689 | 0.19291 | 0.26348 | 0.27645 |
| 1467 | -0.14689 | 0.05691  | 0.16273 | 0.15962 | 0.20583  | 0.14444  | 0.17965 | 0.10453  | 0.21795 | 0.19034 | 0.26038 | 0.27301 |
| 1468 | -0.12452 | 0.06132  | 0.18121 | 0.17706 | 0.21252  | 0.16589  | 0.17593 | 0.10286  | 0.21310 | 0.18979 | 0.25984 | 0.27016 |
| 1469 | -0.12102 | 0.06112  | 0.17024 | 0.18257 | 0.18899  | 0.18040  | 0.17832 | 0.09996  | 0.20281 | 0.18253 | 0.25581 | 0.26460 |
| 1470 | -0.13099 | 0.06272  | 0.14738 | 0.18121 | 0.16365  | 0.18059  | 0.17738 | 0.09504  | 0.19283 | 0.17086 | 0.24668 | 0.25537 |
| 1471 | -0.13617 | 0.07580  | 0.14395 | 0.18105 | 0.17736  | 0.17050  | 0.15927 | 0.09094  | 0.18924 | 0.16149 | 0.23391 | 0.24307 |
| 1472 | -0.13501 | 0.08507  | 0.14634 | 0.17814 | 0.19240  | 0.15751  | 0.14167 | 0.08326  | 0.18562 | 0.15023 | 0.21958 | 0.22862 |
| 1473 | -0.12903 | 0.07896  | 0.13976 | 0.17091 | 0.17573  | 0.14830  | 0.13951 | 0.06996  | 0.17679 | 0.13696 | 0.20595 | 0.21345 |
| 1474 | -0.11610 | 0.06968  | 0.13513 | 0.17016 | 0.15394  | 0.14555  | 0.14183 | 0.05860  | 0.16800 | 0.13660 | 0.19505 | 0.19990 |
| 1475 | -0.10467 | 0.06761  | 0.13569 | 0.17136 | 0.14107  | 0.13996  | 0.14010 | 0.05153  | 0.16053 | 0.14353 | 0.18501 | 0.18828 |
| 1476 | -0.11237 | 0.07579  | 0.13252 | 0.15407 | 0.12856  | 0.11274  | 0.13265 | 0.04423  | 0.15021 | 0.13036 | 0.17048 | 0.17629 |
| 1477 | -0.12422 | 0.07941  | 0.11985 | 0.12979 | 0.11243  | 0.07989  | 0.12024 | 0.03661  | 0.13818 | 0.10644 | 0.15529 | 0.16056 |
| 1478 | -0.11506 | 0.06160  | 0.09793 | 0.12122 | 0.09306  | 0.06834  | 0.10525 | 0.03023  | 0.12795 | 0.09612 | 0.14602 | 0.13886 |
| 1479 | -0.10135 | 0.04249  | 0.08446 | 0.11491 | 0.07533  | 0.06070  | 0.09197 | 0.02159  | 0.11865 | 0.09120 | 0.13682 | 0.11701 |
| 1480 | -0.10278 | 0.03977  | 0.08782 | 0.09853 | 0.06345  | 0.04213  | 0.08301 | 0.00888  | 0.10855 | 0.08137 | 0.12198 | 0.10056 |
| 1481 | -0.11944 | 0.04257  | 0.08573 | 0.08484 | 0.05726  | 0.03060  | 0.07604 | -0.00270 | 0.09693 | 0.07216 | 0.10397 | 0.08958 |
| 1482 | -0.14068 | 0.03825  | 0.07104 | 0.07754 | 0.04830  | 0.02632  | 0.06919 | -0.00984 | 0.08453 | 0.06464 | 0.08758 | 0.08249 |
| 1483 | -0.14900 | 0.01881  | 0.05693 | 0.06763 | 0.02247  | 0.00725  | 0.06199 | -0.01258 | 0.07383 | 0.05357 | 0.07830 | 0.07674 |
| 1484 | -0.15004 | -0.00077 | 0.04486 | 0.05774 | -0.00463 | -0.02205 | 0.05586 | -0.01373 | 0.06934 | 0.04348 | 0.07495 | 0.07036 |
| 1485 | -0.15869 | -0.00111 | 0.03125 | 0.05381 | -0.00906 | -0.04335 | 0.05301 | -0.01612 | 0.07481 | 0.04252 | 0.07309 | 0.06286 |
| 1486 | -0.16960 | -0.00290 | 0.02357 | 0.04434 | -0.00844 | -0.04968 | 0.05434 | -0.01587 | 0.08526 | 0.04858 | 0.07116 | 0.05871 |
| 1487 | -0.17455 | -0.02071 | 0.02480 | 0.02440 | -0.01810 | -0.04329 | 0.05910 | -0.01122 | 0.09402 | 0.05641 | 0.07017 | 0.06045 |
| 1488 | -0.17211 | -0.03144 | 0.02168 | 0.01364 | -0.02288 | -0.03920 | 0.06365 | -0.00898 | 0.09643 | 0.06054 | 0.07462 | 0.06340 |
| 1489 | -0.17063 | -0.03099 | 0.01276 | 0.01511 | -0.01993 | -0.04356 | 0.06571 | -0.00817 | 0.09385 | 0.06100 | 0.08131 | 0.06544 |
| 1490 | -0.18534 | -0.03965 | 0.01077 | 0.01170 | -0.02304 | -0.05074 | 0.06556 | 0.00082  | 0.09358 | 0.06339 | 0.07985 | 0.06825 |
| 1491 | -0.20105 | -0.05241 | 0.01429 | 0.00775 | -0.02962 | -0.05567 | 0.06946 | 0.01368  | 0.09822 | 0.06778 | 0.07893 | 0.07134 |
| 1492 | -0.19372 | -0.05314 | 0.01509 | 0.01525 | -0.02956 | -0.05528 | 0.08270 | 0.02023  | 0.10634 | 0.07133 | 0.09189 | 0.07314 |
| 1493 | -0.18057 | -0.04525 | 0.01345 | 0.02187 | -0.02411 | -0.05256 | 0.09068 | 0.02165  | 0.11165 | 0.07369 | 0.10184 | 0.07322 |
| 1494 | -0.17908 | -0.03861 | 0.01537 | 0.01903 | -0.01950 | -0.05062 | 0.08483 | 0.02212  | 0.11150 | 0.07680 | 0.09619 | 0.07404 |
| 1495 | -0.18179 | -0.04409 | 0.03316 | 0.02107 | -0.02527 | -0.04913 | 0.08161 | 0.02524  | 0.11400 | 0.08570 | 0.09030 | 0.08314 |
| 1496 | -0.17993 | -0.05187 | 0.05593 | 0.03037 | -0.03425 | -0.04605 | 0.08672 | 0.03096  | 0.12080 | 0.09571 | 0.09166 | 0.09504 |
| 1497 | -0.16820 | -0.03324 | 0.05098 | 0.03385 | -0.02354 | -0.03894 | 0.09108 | 0.03552  | 0.12523 | 0.09303 | 0.09501 | 0.09166 |
| 1498 | -0.15325 | -0.00304 | 0.03673 | 0.03082 | -0.00421 | -0.03494 | 0.09428 | 0.03772  | 0.12565 | 0.08620 | 0.09625 | 0.08129 |



|      |          |          |         |         |         |          |         |          |         |         |         |         |
|------|----------|----------|---------|---------|---------|----------|---------|----------|---------|---------|---------|---------|
| 1499 | -0.14573 | 0.00693  | 0.04914 | 0.02802 | 0.00073 | -0.04116 | 0.09970 | 0.03852  | 0.12440 | 0.09142 | 0.09388 | 0.08221 |
| 1500 | -0.14339 | 0.00477  | 0.06690 | 0.03149 | 0.00518 | -0.03964 | 0.10301 | 0.04152  | 0.12758 | 0.09973 | 0.09363 | 0.08708 |
| 1501 | -0.14084 | 0.00463  | 0.06967 | 0.04229 | 0.02000 | -0.02067 | 0.10222 | 0.04825  | 0.13619 | 0.10168 | 0.09923 | 0.08767 |
| 1502 | -0.13414 | 0.00893  | 0.07426 | 0.05140 | 0.02705 | -0.00732 | 0.10487 | 0.05405  | 0.13821 | 0.10223 | 0.10583 | 0.08953 |
| 1503 | -0.12466 | 0.01522  | 0.08648 | 0.05373 | 0.02444 | -0.00735 | 0.11054 | 0.05598  | 0.13322 | 0.10444 | 0.10955 | 0.09346 |
| 1504 | -0.11902 | 0.01809  | 0.09508 | 0.05061 | 0.03040 | -0.00769 | 0.10967 | 0.05412  | 0.13408 | 0.10703 | 0.10908 | 0.09347 |
| 1505 | -0.11901 | 0.01957  | 0.09418 | 0.04862 | 0.04120 | -0.00530 | 0.10347 | 0.05126  | 0.13830 | 0.10745 | 0.10506 | 0.08883 |
| 1506 | -0.12302 | 0.02356  | 0.08454 | 0.05361 | 0.04332 | -0.00306 | 0.09791 | 0.05007  | 0.13646 | 0.10339 | 0.09913 | 0.08208 |
| 1507 | -0.12732 | 0.02257  | 0.08046 | 0.05536 | 0.03883 | -0.00147 | 0.09108 | 0.04639  | 0.12956 | 0.09667 | 0.09258 | 0.07614 |
| 1508 | -0.12768 | 0.01327  | 0.08829 | 0.04776 | 0.03319 | 0.00079  | 0.08231 | 0.03688  | 0.12179 | 0.08990 | 0.08735 | 0.07236 |
| 1509 | -0.12036 | 0.00791  | 0.08952 | 0.04310 | 0.02934 | 0.00742  | 0.07821 | 0.02436  | 0.11773 | 0.08491 | 0.08660 | 0.06852 |
| 1510 | -0.11206 | 0.00963  | 0.08263 | 0.04455 | 0.02997 | 0.01779  | 0.07891 | 0.01478  | 0.11595 | 0.08205 | 0.08640 | 0.06423 |
| 1511 | -0.11843 | 0.01012  | 0.08649 | 0.04374 | 0.03703 | 0.02618  | 0.07694 | 0.01532  | 0.10941 | 0.08001 | 0.07650 | 0.06133 |
| 1512 | -0.13007 | 0.01052  | 0.09827 | 0.04452 | 0.04534 | 0.02744  | 0.07208 | 0.01989  | 0.10167 | 0.07551 | 0.06435 | 0.05866 |
| 1513 | -0.12855 | 0.01483  | 0.10498 | 0.05410 | 0.04803 | 0.02049  | 0.06743 | 0.01800  | 0.10010 | 0.06651 | 0.06294 | 0.05396 |
| 1514 | -0.12092 | 0.01393  | 0.10643 | 0.06157 | 0.04908 | 0.02049  | 0.06129 | 0.01401  | 0.10112 | 0.06144 | 0.06378 | 0.04814 |
| 1515 | -0.11486 | 0.00610  | 0.10638 | 0.05908 | 0.05313 | 0.03317  | 0.05399 | 0.01255  | 0.10053 | 0.06389 | 0.05993 | 0.04248 |
| 1516 | -0.10409 | 0.01281  | 0.10908 | 0.05649 | 0.05968 | 0.03482  | 0.05278 | 0.01004  | 0.09942 | 0.06125 | 0.06062 | 0.03728 |
| 1517 | -0.08990 | 0.03208  | 0.11515 | 0.06166 | 0.06662 | 0.02477  | 0.05640 | 0.00599  | 0.09760 | 0.05330 | 0.06505 | 0.03467 |
| 1518 | -0.08313 | 0.03649  | 0.12145 | 0.07508 | 0.07123 | 0.02790  | 0.05447 | 0.00470  | 0.09281 | 0.05414 | 0.06077 | 0.03829 |
| 1519 | -0.08650 | 0.03704  | 0.12796 | 0.07085 | 0.07443 | 0.02787  | 0.04976 | 0.01080  | 0.08420 | 0.05998 | 0.05265 | 0.04535 |
| 1520 | -0.09562 | 0.05592  | 0.13552 | 0.02722 | 0.07800 | -0.00058 | 0.04949 | 0.02428  | 0.07353 | 0.05940 | 0.05178 | 0.04961 |
| 1521 | -0.09643 | 0.06354  | 0.14048 | 0.00790 | 0.07800 | -0.01363 | 0.04563 | 0.02367  | 0.07050 | 0.05460 | 0.05103 | 0.04630 |
| 1522 | -0.08402 | 0.04009  | 0.13889 | 0.04781 | 0.07137 | 0.01630  | 0.03445 | 0.00120  | 0.07815 | 0.05061 | 0.04466 | 0.03547 |
| 1523 | -0.07846 | 0.01752  | 0.12915 | 0.07041 | 0.06052 | 0.04096  | 0.03018 | -0.00970 | 0.08087 | 0.05010 | 0.04064 | 0.02630 |
| 1524 | -0.08711 | 0.00874  | 0.11629 | 0.05619 | 0.05279 | 0.04108  | 0.03516 | -0.00313 | 0.07502 | 0.05210 | 0.04151 | 0.02336 |
| 1525 | -0.09969 | -0.00001 | 0.11099 | 0.05852 | 0.05826 | 0.03823  | 0.03682 | -0.00653 | 0.07157 | 0.05235 | 0.04198 | 0.02451 |
| 1526 | -0.10571 | -0.00552 | 0.11092 | 0.07155 | 0.06844 | 0.03459  | 0.03061 | -0.01764 | 0.06983 | 0.05033 | 0.03800 | 0.02478 |
| 1527 | -0.09894 | 0.00155  | 0.10913 | 0.06481 | 0.06918 | 0.02493  | 0.02008 | -0.01975 | 0.06594 | 0.04821 | 0.02972 | 0.02077 |
| 1528 | -0.09033 | 0.01075  | 0.11180 | 0.05861 | 0.06908 | 0.02596  | 0.02262 | -0.01223 | 0.07338 | 0.05030 | 0.03166 | 0.02248 |
| 1529 | -0.08734 | 0.01193  | 0.12171 | 0.06885 | 0.07397 | 0.04360  | 0.04226 | -0.00189 | 0.09410 | 0.05677 | 0.04750 | 0.03327 |
| 1530 | -0.08007 | 0.00757  | 0.12672 | 0.07187 | 0.07046 | 0.04836  | 0.04720 | -0.00135 | 0.09593 | 0.05804 | 0.05000 | 0.03481 |
| 1531 | -0.07068 | 0.00157  | 0.12408 | 0.06185 | 0.05756 | 0.03526  | 0.03235 | -0.00947 | 0.07710 | 0.05260 | 0.03727 | 0.02492 |
| 1532 | -0.07426 | -0.00246 | 0.12269 | 0.05692 | 0.04942 | 0.02920  | 0.02485 | -0.01089 | 0.07101 | 0.04873 | 0.03681 | 0.02073 |
| 1533 | -0.07844 | -0.00129 | 0.12455 | 0.06265 | 0.04759 | 0.03451  | 0.02906 | -0.00738 | 0.07950 | 0.05024 | 0.04884 | 0.02376 |
| 1534 | -0.06340 | 0.00528  | 0.12651 | 0.07333 | 0.04734 | 0.04288  | 0.03605 | -0.00761 | 0.08820 | 0.05654 | 0.05909 | 0.02731 |
| 1535 | -0.04747 | 0.00464  | 0.12158 | 0.06850 | 0.04990 | 0.04606  | 0.03943 | -0.00565 | 0.09496 | 0.05996 | 0.06223 | 0.03009 |
| 1536 | -0.04844 | -0.00847 | 0.10990 | 0.04326 | 0.05605 | 0.03967  | 0.03737 | 0.00174  | 0.09920 | 0.05618 | 0.06051 | 0.03226 |
| 1537 | -0.06005 | -0.01659 | 0.10844 | 0.03367 | 0.06183 | 0.02767  | 0.03593 | 0.00364  | 0.09655 | 0.05195 | 0.06640 | 0.03380 |
| 1538 | -0.07238 | -0.01695 | 0.11717 | 0.04615 | 0.06111 | 0.01623  | 0.03564 | -0.00157 | 0.08981 | 0.05067 | 0.07535 | 0.03352 |
| 1539 | -0.07614 | -0.02423 | 0.11663 | 0.05110 | 0.04751 | 0.01235  | 0.03089 | -0.00429 | 0.08899 | 0.05054 | 0.06607 | 0.02962 |
| 1540 | -0.07495 | -0.03453 | 0.10348 | 0.04198 | 0.02964 | 0.01876  | 0.02561 | -0.00494 | 0.09264 | 0.05000 | 0.05067 | 0.02739 |

| <grating<br>change> |          |          |          |          |          |          |         |         |         |         |         |         |
|---------------------|----------|----------|----------|----------|----------|----------|---------|---------|---------|---------|---------|---------|
| 1545                | -0.03766 | -0.01562 | -0.02561 | -0.03052 | -0.04048 | -0.01033 | 0.29757 | 0.25846 | 0.19874 | 0.23468 | 0.25232 | 0.23478 |
| 1546                | -0.03428 | -0.02112 | -0.02472 | -0.02894 | -0.04362 | -0.01189 | 0.28305 | 0.24125 | 0.19394 | 0.22665 | 0.24511 | 0.22268 |
| 1547                | -0.01795 | -0.01734 | -0.01371 | -0.01600 | -0.03997 | -0.00113 | 0.30434 | 0.26019 | 0.21732 | 0.24592 | 0.27209 | 0.23793 |
| 1548                | -0.01999 | -0.01752 | -0.01677 | -0.01576 | -0.03518 | -0.00321 | 0.34457 | 0.29568 | 0.24495 | 0.26949 | 0.30232 | 0.26626 |
| 1549                | -0.02653 | -0.01695 | -0.02497 | -0.02234 | -0.03277 | -0.00854 | 0.36155 | 0.31226 | 0.25287 | 0.27671 | 0.30962 | 0.27830 |
| 1550                | -0.01801 | -0.00965 | -0.02390 | -0.02391 | -0.03443 | -0.00276 | 0.32592 | 0.28618 | 0.22932 | 0.25750 | 0.28268 | 0.25456 |
| 1551                | -0.01440 | -0.00878 | -0.02287 | -0.02675 | -0.03813 | -0.00032 | 0.28936 | 0.25790 | 0.20768 | 0.23777 | 0.25859 | 0.23170 |
| 1552                | -0.03011 | -0.02204 | -0.03003 | -0.03497 | -0.04138 | -0.01124 | 0.29287 | 0.26028 | 0.21198 | 0.23747 | 0.26374 | 0.23703 |
| 1553                | -0.04403 | -0.03316 | -0.03735 | -0.03741 | -0.04286 | -0.01867 | 0.30592 | 0.27148 | 0.21819 | 0.24179 | 0.27139 | 0.24353 |
| 1554                | -0.04550 | -0.03474 | -0.04086 | -0.03129 | -0.04270 | -0.01534 | 0.30229 | 0.26856 | 0.20901 | 0.23664 | 0.26274 | 0.23313 |
| 1555                | -0.04900 | -0.03917 | -0.04683 | -0.03080 | -0.04321 | -0.01571 | 0.28055 | 0.24106 | 0.18981 | 0.21790 | 0.24492 | 0.21541 |
| 1556                | -0.05818 | -0.04723 | -0.05407 | -0.03875 | -0.04609 | -0.02331 | 0.25236 | 0.20550 | 0.16955 | 0.19334 | 0.22689 | 0.19996 |
| 1557                | -0.06303 | -0.04619 | -0.05315 | -0.04429 | -0.05196 | -0.02793 | 0.23980 | 0.20345 | 0.15822 | 0.18170 | 0.21655 | 0.19320 |
| 1558                | -0.06665 | -0.04298 | -0.04965 | -0.04598 | -0.05798 | -0.02898 | 0.24296 | 0.22333 | 0.15641 | 0.18403 | 0.21423 | 0.19557 |
| 1559                | -0.08032 | -0.05624 | -0.05792 | -0.04912 | -0.05941 | -0.03242 | 0.24619 | 0.21867 | 0.15766 | 0.18829 | 0.21499 | 0.20277 |
| 1560                | -0.09512 | -0.07167 | -0.06659 | -0.05121 | -0.05732 | -0.03379 | 0.24590 | 0.19883 | 0.15693 | 0.18972 | 0.21720 | 0.20772 |
| 1561                | -0.09695 | -0.06624 | -0.05850 | -0.04849 | -0.05606 | -0.02744 | 0.24462 | 0.19521 | 0.15158 | 0.18796 | 0.22053 | 0.20437 |
| 1562                | -0.10089 | -0.06285 | -0.05784 | -0.05312 | -0.06161 | -0.03100 | 0.24326 | 0.20005 | 0.14765 | 0.18553 | 0.22182 | 0.20005 |
| 1563                | -0.12075 | -0.08435 | -0.08655 | -0.07399 | -0.07649 | -0.05718 | 0.24102 | 0.19733 | 0.15023 | 0.18415 | 0.21832 | 0.20202 |
| 1564                | -0.13112 | -0.09836 | -0.10898 | -0.08953 | -0.08912 | -0.07338 | 0.23319 | 0.18896 | 0.15061 | 0.17944 | 0.21220 | 0.20138 |
| 1565                | -0.11750 | -0.08471 | -0.10027 | -0.08607 | -0.09205 | -0.06070 | 0.21589 | 0.17752 | 0.14069 | 0.16659 | 0.20333 | 0.18909 |
| 1566                | -0.11044 | -0.07917 | -0.08963 | -0.08349 | -0.09441 | -0.05459 | 0.18936 | 0.15820 | 0.12082 | 0.14316 | 0.18386 | 0.16418 |
| 1567                | -0.12415 | -0.09709 | -0.09535 | -0.09301 | -0.10115 | -0.07093 | 0.16411 | 0.13391 | 0.09824 | 0.11734 | 0.15762 | 0.13642 |
| 1568                | -0.13803 | -0.11049 | -0.10698 | -0.10509 | -0.10726 | -0.08394 | 0.16428 | 0.12060 | 0.08828 | 0.11214 | 0.14720 | 0.12937 |
| 1569                | -0.14382 | -0.11118 | -0.11808 | -0.11417 | -0.11322 | -0.08678 | 0.17963 | 0.11906 | 0.08964 | 0.12127 | 0.14952 | 0.13776 |
| 1570                | -0.14921 | -0.11484 | -0.12897 | -0.12086 | -0.12551 | -0.09524 | 0.16591 | 0.11366 | 0.08381 | 0.10904 | 0.13503 | 0.12729 |
| 1571                | -0.15782 | -0.12377 | -0.13931 | -0.12723 | -0.14039 | -0.10939 | 0.13057 | 0.10097 | 0.06854 | 0.08147 | 0.10787 | 0.10087 |
| 1572                | -0.16796 | -0.12968 | -0.14703 | -0.13442 | -0.14713 | -0.11754 | 0.11508 | 0.08740 | 0.05381 | 0.07160 | 0.09455 | 0.08651 |
| 1573                | -0.16329 | -0.12457 | -0.14166 | -0.12946 | -0.14034 | -0.11188 | 0.12300 | 0.08261 | 0.04867 | 0.07752 | 0.09741 | 0.08824 |
| 1574                | -0.13103 | -0.10581 | -0.11631 | -0.10182 | -0.12168 | -0.09209 | 0.13988 | 0.09383 | 0.05830 | 0.08283 | 0.10694 | 0.09799 |
| 1575                | -0.11399 | -0.09748 | -0.10419 | -0.08931 | -0.11526 | -0.08640 | 0.15616 | 0.10797 | 0.07095 | 0.08645 | 0.11493 | 0.10758 |
| 1576                | -0.14572 | -0.11662 | -0.13009 | -0.12074 | -0.13722 | -0.11425 | 0.16468 | 0.11052 | 0.07389 | 0.08983 | 0.11577 | 0.11042 |
| 1577                | -0.16861 | -0.12787 | -0.14725 | -0.14224 | -0.15263 | -0.13480 | 0.16089 | 0.10424 | 0.06935 | 0.08621 | 0.11098 | 0.10540 |
| 1578                | -0.14547 | -0.11001 | -0.12683 | -0.11950 | -0.13914 | -0.12198 | 0.14809 | 0.09597 | 0.06392 | 0.07536 | 0.10476 | 0.09628 |
| 1579                | -0.12567 | -0.09669 | -0.11196 | -0.09894 | -0.12522 | -0.10981 | 0.14535 | 0.09355 | 0.06659 | 0.07499 | 0.10369 | 0.09496 |
| 1580                | -0.13079 | -0.09992 | -0.11823 | -0.10105 | -0.12265 | -0.11131 | 0.15780 | 0.09881 | 0.07712 | 0.08911 | 0.10930 | 0.10429 |
| 1581                | -0.12525 | -0.08986 | -0.10759 | -0.09294 | -0.10919 | -0.09775 | 0.16757 | 0.10476 | 0.08180 | 0.09852 | 0.11547 | 0.11258 |
| 1582                | -0.10094 | -0.06277 | -0.07743 | -0.06778 | -0.08423 | -0.06859 | 0.17464 | 0.11227 | 0.08371 | 0.10117 | 0.12303 | 0.11825 |
| 1583                | -0.08114 | -0.04320 | -0.06271 | -0.04828 | -0.07018 | -0.05299 | 0.19662 | 0.12953 | 0.10171 | 0.11273 | 0.13917 | 0.13022 |
| 1584                | -0.07327 | -0.03465 | -0.06255 | -0.03994 | -0.06729 | -0.04961 | 0.21978 | 0.14672 | 0.12536 | 0.12812 | 0.15434 | 0.14443 |
| 1585                | -0.07249 | -0.02679 | -0.05372 | -0.03573 | -0.06158 | -0.03851 | 0.21378 | 0.14498 | 0.12766 | 0.13008 | 0.15067 | 0.14904 |

|      |          |          |          |          |          |          |          |          |          |          |          |          |
|------|----------|----------|----------|----------|----------|----------|----------|----------|----------|----------|----------|----------|
| 1586 | -0.07146 | -0.02245 | -0.04127 | -0.03101 | -0.05319 | -0.02715 | 0.19207  | 0.13364  | 0.11482  | 0.12273  | 0.13697  | 0.14348  |
| 1587 | -0.06435 | -0.02768 | -0.03911 | -0.02386 | -0.04768 | -0.03028 | 0.18244  | 0.13074  | 0.10556  | 0.11793  | 0.13097  | 0.13289  |
| 1588 | -0.05772 | -0.03355 | -0.03876 | -0.01956 | -0.04431 | -0.03489 | 0.18132  | 0.13185  | 0.10295  | 0.11572  | 0.13238  | 0.12425  |
| 1589 | -0.06046 | -0.03294 | -0.03215 | -0.02339 | -0.04224 | -0.02843 | 0.17838  | 0.12833  | 0.10417  | 0.11286  | 0.13505  | 0.12210  |
| 1590 | -0.07669 | -0.03901 | -0.03467 | -0.03356 | -0.04654 | -0.02714 | 0.17251  | 0.12021  | 0.10312  | 0.10724  | 0.13202  | 0.12142  |
| 1591 | -0.10194 | -0.05710 | -0.05371 | -0.04579 | -0.05799 | -0.04042 | 0.16428  | 0.11012  | 0.09619  | 0.09778  | 0.12155  | 0.11744  |
| 1592 | -0.11611 | -0.06791 | -0.07038 | -0.05375 | -0.06600 | -0.05159 | 0.15380  | 0.10228  | 0.08646  | 0.08505  | 0.11304  | 0.10988  |
| 1593 | -0.11667 | -0.06803 | -0.07753 | -0.05777 | -0.06888 | -0.05514 | 0.14055  | 0.09531  | 0.07586  | 0.07162  | 0.10787  | 0.09934  |
| 1594 | -0.12791 | -0.07993 | -0.08880 | -0.06759 | -0.07904 | -0.06546 | 0.12340  | 0.08006  | 0.06354  | 0.06223  | 0.09458  | 0.08695  |
| 1595 | -0.15474 | -0.10528 | -0.10707 | -0.08380 | -0.09769 | -0.08375 | 0.10474  | 0.05737  | 0.04878  | 0.05382  | 0.07431  | 0.07530  |
| 1596 | -0.18229 | -0.12528 | -0.12404 | -0.09833 | -0.11487 | -0.09804 | 0.08994  | 0.03781  | 0.03140  | 0.03681  | 0.06028  | 0.06770  |
| 1597 | -0.20734 | -0.14146 | -0.14153 | -0.11396 | -0.12998 | -0.11024 | 0.07831  | 0.02538  | 0.01332  | 0.01592  | 0.05249  | 0.06058  |
| 1598 | -0.23412 | -0.16710 | -0.16667 | -0.13876 | -0.14830 | -0.13003 | 0.06539  | 0.01816  | -0.00272 | 0.00305  | 0.04267  | 0.04705  |
| 1599 | -0.26140 | -0.19877 | -0.19416 | -0.16503 | -0.17053 | -0.15441 | 0.04893  | 0.00472  | -0.01832 | -0.00803 | 0.02863  | 0.02974  |
| 1600 | -0.28901 | -0.22932 | -0.21820 | -0.18463 | -0.19684 | -0.17830 | 0.02787  | -0.02587 | -0.03690 | -0.02884 | 0.01054  | 0.01370  |
| 1601 | -0.33352 | -0.26954 | -0.25711 | -0.22060 | -0.23483 | -0.21383 | 0.00164  | -0.06259 | -0.06124 | -0.05751 | -0.01313 | -0.00486 |
| 1602 | -0.40040 | -0.32442 | -0.31967 | -0.28572 | -0.28509 | -0.26703 | -0.02889 | -0.09196 | -0.09129 | -0.08811 | -0.04250 | -0.02916 |
| 1603 | -0.44692 | -0.36564 | -0.36478 | -0.33446 | -0.32060 | -0.31035 | -0.05910 | -0.11250 | -0.11902 | -0.11429 | -0.07183 | -0.05304 |
| 1604 | -0.46351 | -0.38791 | -0.38163 | -0.35156 | -0.33802 | -0.33619 | -0.08846 | -0.13123 | -0.14331 | -0.13735 | -0.09899 | -0.07546 |
| 1605 | -0.52382 | -0.44378 | -0.43783 | -0.40326 | -0.39086 | -0.38873 | -0.12590 | -0.16726 | -0.17956 | -0.17366 | -0.13120 | -0.10899 |
| 1606 | -0.64277 | -0.54541 | -0.54670 | -0.50552 | -0.48928 | -0.47763 | -0.17286 | -0.22336 | -0.23224 | -0.22570 | -0.17200 | -0.15650 |
| 1607 | -0.74440 | -0.64199 | -0.63761 | -0.59476 | -0.57715 | -0.55844 | -0.21916 | -0.27853 | -0.28805 | -0.27501 | -0.21801 | -0.20540 |
| 1608 | -0.79752 | -0.70471 | -0.68634 | -0.64531 | -0.63081 | -0.60920 | -0.25558 | -0.31828 | -0.32990 | -0.31102 | -0.25837 | -0.24279 |
| 1609 | -0.81932 | -0.73150 | -0.71652 | -0.67203 | -0.66147 | -0.63395 | -0.27639 | -0.33772 | -0.34193 | -0.33309 | -0.27837 | -0.25889 |
| 1610 | -0.83602 | -0.74423 | -0.74319 | -0.69121 | -0.68438 | -0.65364 | -0.29631 | -0.35451 | -0.34913 | -0.35483 | -0.29322 | -0.27178 |
| 1611 | -0.87523 | -0.77578 | -0.77539 | -0.71918 | -0.71577 | -0.69536 | -0.33759 | -0.39431 | -0.39269 | -0.39416 | -0.33103 | -0.31052 |
| 1612 | -0.94276 | -0.83474 | -0.82611 | -0.77279 | -0.76668 | -0.75842 | -0.38496 | -0.44072 | -0.44741 | -0.43785 | -0.37704 | -0.35847 |
| 1613 | -1.02901 | -0.91285 | -0.90080 | -0.85720 | -0.83834 | -0.82779 | -0.41246 | -0.46585 | -0.47061 | -0.46414 | -0.40440 | -0.38621 |
| 1614 | -1.09692 | -0.97341 | -0.96359 | -0.92469 | -0.89818 | -0.87737 | -0.41727 | -0.47034 | -0.46784 | -0.47214 | -0.41367 | -0.39415 |
| 1615 | -1.11866 | -0.98880 | -0.98325 | -0.93722 | -0.91847 | -0.89020 | -0.40492 | -0.46162 | -0.45507 | -0.46674 | -0.41072 | -0.38972 |
| 1616 | -1.11477 | -0.98023 | -0.97494 | -0.92698 | -0.91257 | -0.88446 | -0.38613 | -0.44374 | -0.43955 | -0.45278 | -0.39474 | -0.37666 |
| 1617 | -1.10275 | -0.96638 | -0.95559 | -0.91826 | -0.89525 | -0.87414 | -0.36640 | -0.42159 | -0.42401 | -0.43294 | -0.36925 | -0.35828 |
| 1618 | -1.07774 | -0.94416 | -0.92946 | -0.89647 | -0.86997 | -0.85317 | -0.33955 | -0.40253 | -0.40543 | -0.40596 | -0.34793 | -0.33817 |
| 1619 | -1.03735 | -0.90827 | -0.89458 | -0.85397 | -0.83744 | -0.81875 | -0.30466 | -0.38303 | -0.38013 | -0.37227 | -0.32978 | -0.31464 |
| 1620 | -0.98555 | -0.85419 | -0.84347 | -0.79778 | -0.79640 | -0.77511 | -0.26902 | -0.34627 | -0.34474 | -0.33499 | -0.29456 | -0.27978 |
| 1621 | -0.92337 | -0.78539 | -0.78089 | -0.73356 | -0.74372 | -0.72414 | -0.23430 | -0.29622 | -0.30206 | -0.29718 | -0.24490 | -0.23718 |
| 1622 | -0.85057 | -0.71275 | -0.72134 | -0.66572 | -0.67657 | -0.66610 | -0.19689 | -0.25422 | -0.26003 | -0.26141 | -0.20324 | -0.19998 |
| 1623 | -0.78506 | -0.65081 | -0.66468 | -0.60695 | -0.61167 | -0.61028 | -0.15598 | -0.22183 | -0.22311 | -0.22788 | -0.17431 | -0.16998 |
| 1624 | -0.74869 | -0.61225 | -0.60529 | -0.56944 | -0.57062 | -0.56757 | -0.11358 | -0.18920 | -0.19262 | -0.19485 | -0.15058 | -0.14186 |
| 1625 | -0.71674 | -0.58432 | -0.56141 | -0.52900 | -0.52955 | -0.52283 | -0.07882 | -0.15270 | -0.16390 | -0.15756 | -0.11709 | -0.10973 |
| 1626 | -0.65983 | -0.54837 | -0.54800 | -0.46124 | -0.46144 | -0.46065 | -0.05877 | -0.11306 | -0.13185 | -0.11396 | -0.06508 | -0.07115 |
| 1627 | -0.60820 | -0.50427 | -0.52538 | -0.40304 | -0.40379 | -0.40901 | -0.03987 | -0.07847 | -0.09941 | -0.07855 | -0.02433 | -0.03892 |
| 1628 | -0.58873 | -0.45893 | -0.46569 | -0.38446 | -0.38827 | -0.38962 | -0.01102 | -0.05498 | -0.07035 | -0.06209 | -0.01632 | -0.02226 |

|      |          |          |          |          |          |          |         |          |          |          |          |          |
|------|----------|----------|----------|----------|----------|----------|---------|----------|----------|----------|----------|----------|
| 1629 | -0.57581 | -0.42515 | -0.41293 | -0.37264 | -0.38372 | -0.37584 | 0.01721 | -0.03745 | -0.04471 | -0.05325 | -0.01189 | -0.00948 |
| 1630 | -0.55340 | -0.40684 | -0.39391 | -0.34572 | -0.36532 | -0.34966 | 0.03665 | -0.02182 | -0.02400 | -0.04172 | 0.00678  | 0.00729  |
| 1631 | -0.53875 | -0.39012 | -0.38211 | -0.32114 | -0.33927 | -0.32372 | 0.05022 | -0.00957 | -0.01329 | -0.02622 | 0.02139  | 0.02249  |
| 1632 | -0.53364 | -0.36958 | -0.36260 | -0.30560 | -0.31429 | -0.30467 | 0.06006 | -0.00313 | -0.01013 | -0.01191 | 0.02356  | 0.03263  |
| 1633 | -0.51769 | -0.35225 | -0.34152 | -0.28798 | -0.29747 | -0.28783 | 0.06587 | -0.00489 | -0.00300 | -0.00987 | 0.02210  | 0.03851  |
| 1634 | -0.49549 | -0.34071 | -0.32057 | -0.26770 | -0.28546 | -0.27205 | 0.06851 | -0.00797 | 0.00713  | -0.01529 | 0.02679  | 0.04202  |
| 1635 | -0.49095 | -0.33290 | -0.29770 | -0.25340 | -0.26780 | -0.25960 | 0.06960 | 0.00027  | 0.00965  | -0.01165 | 0.04503  | 0.04549  |
| 1636 | -0.49837 | -0.32548 | -0.28221 | -0.24713 | -0.25057 | -0.25103 | 0.06801 | 0.01143  | 0.00827  | -0.00288 | 0.06095  | 0.04944  |
| 1637 | -0.49837 | -0.31611 | -0.28594 | -0.24609 | -0.24640 | -0.24617 | 0.06237 | 0.00944  | 0.01259  | -0.00215 | 0.05212  | 0.05356  |
| 1638 | -0.49558 | -0.31238 | -0.29509 | -0.24214 | -0.24832 | -0.24709 | 0.06031 | 0.00676  | 0.01584  | -0.00524 | 0.03836  | 0.05897  |
| 1639 | -0.50057 | -0.32165 | -0.29283 | -0.22998 | -0.24578 | -0.25401 | 0.06858 | 0.01875  | 0.01014  | -0.00358 | 0.04556  | 0.06654  |
| 1640 | -0.51042 | -0.33467 | -0.28966 | -0.22402 | -0.24405 | -0.25633 | 0.07677 | 0.02808  | 0.00857  | 0.00158  | 0.05831  | 0.07378  |
| 1641 | -0.52217 | -0.34239 | -0.29619 | -0.23445 | -0.24895 | -0.25020 | 0.07679 | 0.02234  | 0.02038  | 0.00761  | 0.06025  | 0.07813  |
| 1642 | -0.54147 | -0.34715 | -0.30546 | -0.24777 | -0.25736 | -0.25614 | 0.07800 | 0.02315  | 0.03121  | 0.01469  | 0.05953  | 0.07895  |
| 1643 | -0.56681 | -0.35181 | -0.31358 | -0.25453 | -0.26413 | -0.27801 | 0.08593 | 0.03941  | 0.03369  | 0.02162  | 0.06360  | 0.07883  |
| 1644 | -0.58213 | -0.35675 | -0.32644 | -0.25879 | -0.26330 | -0.28450 | 0.09477 | 0.04881  | 0.03893  | 0.02423  | 0.07168  | 0.08517  |
| 1645 | -0.58232 | -0.35726 | -0.33578 | -0.25694 | -0.25531 | -0.26782 | 0.10137 | 0.04700  | 0.04968  | 0.02487  | 0.08111  | 0.09702  |
| 1646 | -0.57609 | -0.34334 | -0.31726 | -0.23576 | -0.24754 | -0.25102 | 0.10712 | 0.05326  | 0.05700  | 0.03337  | 0.08820  | 0.10366  |
| 1647 | -0.55743 | -0.31294 | -0.27758 | -0.19937 | -0.23606 | -0.23874 | 0.11402 | 0.06537  | 0.05852  | 0.04779  | 0.09477  | 0.10517  |
| 1648 | -0.51181 | -0.27171 | -0.24619 | -0.16563 | -0.20955 | -0.22008 | 0.12357 | 0.06541  | 0.05794  | 0.05758  | 0.10594  | 0.10987  |
| 1649 | -0.46319 | -0.23472 | -0.22265 | -0.14437 | -0.17676 | -0.19254 | 0.13054 | 0.06261  | 0.06071  | 0.06326  | 0.11582  | 0.11713  |
| 1650 | -0.44722 | -0.21817 | -0.19357 | -0.13774 | -0.15430 | -0.15983 | 0.12926 | 0.07637  | 0.07153  | 0.07069  | 0.11580  | 0.12236  |
| 1651 | -0.44260 | -0.21491 | -0.16866 | -0.12974 | -0.13931 | -0.13374 | 0.13351 | 0.09616  | 0.08552  | 0.07991  | 0.11740  | 0.12788  |
| 1652 | -0.41942 | -0.21127 | -0.15990 | -0.10550 | -0.12417 | -0.12356 | 0.15477 | 0.10584  | 0.09550  | 0.08891  | 0.13274  | 0.13673  |
| 1653 | -0.39484 | -0.20168 | -0.15526 | -0.07968 | -0.11033 | -0.11807 | 0.16864 | 0.10996  | 0.09904  | 0.09574  | 0.14807  | 0.14503  |
| 1654 | -0.38988 | -0.18662 | -0.14434 | -0.06817 | -0.10110 | -0.10757 | 0.15644 | 0.11495  | 0.09707  | 0.09974  | 0.15047  | 0.14942  |
| 1655 | -0.40717 | -0.17705 | -0.13501 | -0.07225 | -0.09898 | -0.09827 | 0.13521 | 0.11976  | 0.09617  | 0.10332  | 0.14451  | 0.15187  |

**Table III.** Global analysis data for 3HF and 3HTC. The collective spectral data for each compound at each frequency over time (0.2-10 ps) were fit using Nonlinear Curve Fit-Global Fitting in Origin with 5 cm<sup>-1</sup> resolution. Output consists of a static profile (A<sub>0</sub>) and a shorter-lived profile (A<sub>1</sub>) which follows a monoexponential decay at a constant value determined by the fit (t<sub>1</sub>).

| Global Analysis | 3HF                           |                      |                           |                      |                           |                      | 3HTC                      |                      |                           |                      |                           |                      |
|-----------------|-------------------------------|----------------------|---------------------------|----------------------|---------------------------|----------------------|---------------------------|----------------------|---------------------------|----------------------|---------------------------|----------------------|
|                 | Frequency (cm <sup>-1</sup> ) | A <sub>0</sub> Value | A <sub>0</sub> Std. Error | A <sub>1</sub> Value | A <sub>1</sub> Std. Error | t <sub>1</sub> Value | t <sub>1</sub> Std. Error | A <sub>0</sub> Value | A <sub>0</sub> Std. Error | A <sub>1</sub> Value | A <sub>1</sub> Std. Error | t <sub>1</sub> Value |
| 1245            | 0.34030                       | 0.00433              | 0.04064                   | 0.00967              | 1073.77666                | 70.90087             | 0.22195                   | 0.00547              | 0.01226                   | 0.00856              | 3207.06984                | 173.88538            |
| 1250            | 0.32395                       | 0.00432              | 0.02302                   | 0.00965              | 1073.77666                | 70.90087             | 0.22313                   | 0.00548              | 0.02813                   | 0.00856              | 3207.06984                | 173.88538            |
| 1255            | 0.31447                       | 0.00432              | 0.03384                   | 0.00966              | 1073.77666                | 70.90087             | 0.21560                   | 0.00551              | 0.04462                   | 0.00857              | 3207.06984                | 173.88538            |
| 1260            | 0.32193                       | 0.00432              | 0.03489                   | 0.00966              | 1073.77666                | 70.90087             | 0.19964                   | 0.00552              | 0.04872                   | 0.00857              | 3207.06984                | 173.88538            |
| 1265            | 0.31946                       | 0.00432              | 0.01871                   | 0.00965              | 1073.77666                | 70.90087             | 0.18969                   | 0.00553              | 0.05178                   | 0.00857              | 3207.06984                | 173.88538            |
| 1270            | 0.33694                       | 0.00432              | 0.01139                   | 0.00965              | 1073.77666                | 70.90087             | 0.19188                   | 0.00554              | 0.05622                   | 0.00857              | 3207.06984                | 173.88538            |
| 1275            | 0.34522                       | 0.00432              | 0.00613                   | 0.00964              | 1073.77666                | 70.90087             | 0.21300                   | 0.00548              | 0.02488                   | 0.00856              | 3207.06984                | 173.88538            |
| 1280            | 0.38232                       | 0.00432              | -0.02102                  | 0.00965              | 1073.77666                | 70.90087             | 0.22424                   | 0.00547              | -0.02101                  | 0.00856              | 3207.06984                | 173.88538            |
| 1285            | 0.44166                       | 0.00432              | -0.03372                  | 0.00966              | 1073.77666                | 70.90087             | 0.21572                   | 0.00553              | -0.05034                  | 0.00857              | 3207.06984                | 173.88538            |
| 1290            | 0.51981                       | 0.00434              | -0.06149                  | 0.00969              | 1073.77666                | 70.90087             | 0.19885                   | 0.00558              | -0.06796                  | 0.00858              | 3207.06984                | 173.88538            |
| 1295            | 0.55842                       | 0.00434              | -0.05823                  | 0.00969              | 1073.77666                | 70.90087             | 0.25379                   | 0.00569              | -0.09527                  | 0.00860              | 3207.06984                | 173.88538            |
| 1300            | 0.54709                       | 0.00433              | -0.04163                  | 0.00967              | 1073.77666                | 70.90087             | 0.40775                   | 0.00595              | -0.14101                  | 0.00866              | 3207.06984                | 173.88538            |
| 1305            | 0.48115                       | 0.00432              | -0.01346                  | 0.00965              | 1073.77666                | 70.90087             | 0.59093                   | 0.00636              | -0.19449                  | 0.00874              | 3207.06984                | 173.88538            |
| 1310            | 0.38861                       | 0.00432              | 0.01920                   | 0.00965              | 1073.77666                | 70.90087             | 0.68492                   | 0.00646              | -0.20664                  | 0.00877              | 3207.06984                | 173.88538            |
| 1315            | 0.29482                       | 0.00433              | 0.04902                   | 0.00967              | 1073.77666                | 70.90087             | 0.63772                   | 0.00601              | -0.14950                  | 0.00867              | 3207.06984                | 173.88538            |
| 1320            | 0.23247                       | 0.00434              | 0.06349                   | 0.00970              | 1073.77666                | 70.90087             | 0.56471                   | 0.00565              | -0.08550                  | 0.00859              | 3207.06984                | 173.88538            |
| 1325            | 0.23272                       | 0.00434              | 0.05607                   | 0.00968              | 1073.77666                | 70.90087             | 0.57006                   | 0.00554              | -0.05391                  | 0.00857              | 3207.06984                | 173.88538            |
| 1330            | 0.29174                       | 0.00432              | 0.03341                   | 0.00966              | 1073.77666                | 70.90087             | 0.60027                   | 0.00553              | -0.05322                  | 0.00857              | 3207.06984                | 173.88538            |
| 1335            | 0.36292                       | 0.00432              | -0.01089                  | 0.00965              | 1073.77666                | 70.90087             | 0.58140                   | 0.00551              | -0.04306                  | 0.00857              | 3207.06984                | 173.88538            |
| 1340            | 0.40432                       | 0.00432              | -0.03215                  | 0.00966              | 1073.77666                | 70.90087             | 0.45131                   | 0.00546              | -0.00506                  | 0.00856              | 3207.06984                | 173.88538            |
| 1345            | 0.37934                       | 0.00432              | -0.02985                  | 0.00966              | 1073.77666                | 70.90087             | 0.29866                   | 0.00551              | 0.04227                   | 0.00857              | 3207.06984                | 173.88538            |
| 1350            | 0.31442                       | 0.00432              | -0.00358                  | 0.00964              | 1073.77666                | 70.90087             | 0.19339                   | 0.00561              | 0.07653                   | 0.00859              | 3207.06984                | 173.88538            |
| 1355            | 0.18208                       | 0.00443              | 0.12974                   | 0.00986              | 1073.77666                | 70.90087             | 0.12983                   | 0.00564              | 0.08432                   | 0.00859              | 3207.06984                | 173.88538            |
| 1360            | 0.17436                       | 0.00439              | 0.10314                   | 0.00978              | 1073.77666                | 70.90087             | 0.14973                   | 0.00570              | 0.09688                   | 0.00860              | 3207.06984                | 173.88538            |
| 1365            | 0.17707                       | 0.00435              | 0.07293                   | 0.00971              | 1073.77666                | 70.90087             | 0.18634                   | 0.00576              | 0.10955                   | 0.00862              | 3207.06984                | 173.88538            |
| 1370            | 0.20077                       | 0.00432              | 0.02667                   | 0.00965              | 1073.77666                | 70.90087             | 0.22940                   | 0.00594              | 0.13980                   | 0.00865              | 3207.06984                | 173.88538            |
| 1375            | 0.20668                       | 0.00432              | 0.00453                   | 0.00964              | 1073.77666                | 70.90087             | 0.27572                   | 0.00604              | 0.15409                   | 0.00867              | 3207.06984                | 173.88538            |
| 1380            | 0.15831                       | 0.00432              | 0.03296                   | 0.00966              | 1073.77666                | 70.90087             | 0.29743                   | 0.00593              | 0.13796                   | 0.00865              | 3207.06984                | 173.88538            |
| 1385            | 0.11927                       | 0.00433              | 0.04869                   | 0.00967              | 1073.77666                | 70.90087             | 0.33905                   | 0.00557              | 0.06499                   | 0.00858              | 3207.06984                | 173.88538            |
| 1390            | 0.08197                       | 0.00434              | 0.06295                   | 0.00969              | 1073.77666                | 70.90087             | 0.33703                   | 0.00548              | 0.02503                   | 0.00856              | 3207.06984                | 173.88538            |
| 1395            | 0.05865                       | 0.00434              | 0.06375                   | 0.00970              | 1073.77666                | 70.90087             | 0.34261                   | 0.00547              | -0.01882                  | 0.00856              | 3207.06984                | 173.88538            |
| 1400            | 0.02532                       | 0.00434              | 0.05792                   | 0.00969              | 1073.77666                | 70.90087             | 0.34356                   | 0.00551              | -0.04458                  | 0.00857              | 3207.06984                | 173.88538            |
| 1405            | -0.03278                      | 0.00433              | 0.04877                   | 0.00967              | 1073.77666                | 70.90087             | 0.27589                   | 0.00552              | -0.04949                  | 0.00857              | 3207.06984                | 173.88538            |
| 1410            | -0.11323                      | 0.00432              | 0.03300                   | 0.00966              | 1073.77666                | 70.90087             | 0.13850                   | 0.00549              | -0.03435                  | 0.00856              | 3207.06984                | 173.88538            |

|      |          |         |          |         |            |          |          |         |          |         |            |           |
|------|----------|---------|----------|---------|------------|----------|----------|---------|----------|---------|------------|-----------|
| 1415 | -0.19779 | 0.00432 | 0.02005  | 0.00965 | 1073.77666 | 70.90087 | -0.00803 | 0.00548 | -0.02387 | 0.00856 | 3207.06984 | 173.88538 |
| 1420 | -0.21309 | 0.00432 | 0.00984  | 0.00965 | 1073.77666 | 70.90087 | -0.12322 | 0.00547 | -0.01590 | 0.00856 | 3207.06984 | 173.88538 |
| 1425 | -0.14117 | 0.00432 | 0.01261  | 0.00965 | 1073.77666 | 70.90087 | -0.26071 | 0.00547 | -0.02075 | 0.00856 | 3207.06984 | 173.88538 |
| 1430 | -0.02601 | 0.00432 | 0.01206  | 0.00965 | 1073.77666 | 70.90087 | -0.34670 | 0.00548 | -0.02795 | 0.00856 | 3207.06984 | 173.88538 |
| 1435 | 0.08093  | 0.00432 | 0.00670  | 0.00964 | 1073.77666 | 70.90087 | -0.26305 | 0.00548 | -0.02700 | 0.00856 | 3207.06984 | 173.88538 |
| 1440 | 0.15361  | 0.00432 | 0.00151  | 0.00964 | 1073.77666 | 70.90087 | -0.06596 | 0.00547 | -0.01112 | 0.00856 | 3207.06984 | 173.88538 |
| 1445 | 0.17363  | 0.00432 | -0.01181 | 0.00965 | 1073.77666 | 70.90087 | 0.10005  | 0.00546 | -0.00442 | 0.00856 | 3207.06984 | 173.88538 |
| 1450 | 0.13607  | 0.00432 | -0.02603 | 0.00965 | 1073.77666 | 70.90087 | 0.17759  | 0.00547 | -0.01706 | 0.00856 | 3207.06984 | 173.88538 |
| 1455 | 0.11102  | 0.00433 | -0.04809 | 0.00967 | 1073.77666 | 70.90087 | 0.21344  | 0.00553 | -0.05093 | 0.00857 | 3207.06984 | 173.88538 |
| 1460 | 0.13998  | 0.00436 | -0.08451 | 0.00973 | 1073.77666 | 70.90087 | 0.26083  | 0.00570 | -0.09757 | 0.00860 | 3207.06984 | 173.88538 |
| 1465 | 0.18198  | 0.00440 | -0.10899 | 0.00979 | 1073.77666 | 70.90087 | 0.29604  | 0.00597 | -0.14348 | 0.00866 | 3207.06984 | 173.88538 |
| 1470 | 0.18648  | 0.00438 | -0.09656 | 0.00976 | 1073.77666 | 70.90087 | 0.27571  | 0.00597 | -0.14359 | 0.00866 | 3207.06984 | 173.88538 |
| 1475 | 0.13595  | 0.00432 | -0.03732 | 0.00966 | 1073.77666 | 70.90087 | 0.21258  | 0.00578 | -0.11254 | 0.00862 | 3207.06984 | 173.88538 |
| 1480 | 0.05655  | 0.00432 | 0.02319  | 0.00965 | 1073.77666 | 70.90087 | 0.13225  | 0.00562 | -0.07996 | 0.00859 | 3207.06984 | 173.88538 |
| 1485 | -0.00982 | 0.00433 | 0.04068  | 0.00967 | 1073.77666 | 70.90087 | 0.08348  | 0.00555 | -0.05966 | 0.00858 | 3207.06984 | 173.88538 |
| 1490 | -0.03796 | 0.00433 | 0.04579  | 0.00967 | 1073.77666 | 70.90087 | 0.09302  | 0.00552 | -0.04581 | 0.00857 | 3207.06984 | 173.88538 |
| 1495 | -0.03044 | 0.00433 | 0.04422  | 0.00967 | 1073.77666 | 70.90087 | 0.10171  | 0.00549 | -0.03327 | 0.00856 | 3207.06984 | 173.88538 |
| 1500 | -0.00448 | 0.00433 | 0.05332  | 0.00968 | 1073.77666 | 70.90087 | 0.10990  | 0.00548 | -0.02244 | 0.00856 | 3207.06984 | 173.88538 |
| 1505 | 0.02445  | 0.00433 | 0.04398  | 0.00967 | 1073.77666 | 70.90087 | 0.11205  | 0.00547 | -0.01711 | 0.00856 | 3207.06984 | 173.88538 |
| 1510 | 0.03515  | 0.00432 | 0.02975  | 0.00966 | 1073.77666 | 70.90087 | 0.08731  | 0.00547 | -0.01381 | 0.00856 | 3207.06984 | 173.88538 |
| 1515 | 0.05035  | 0.00432 | 0.01801  | 0.00965 | 1073.77666 | 70.90087 | 0.06903  | 0.00547 | -0.01381 | 0.00856 | 3207.06984 | 173.88538 |
| 1520 | 0.06426  | 0.00432 | 0.02507  | 0.00965 | 1073.77666 | 70.90087 | 0.05692  | 0.00546 | -0.01000 | 0.00856 | 3207.06984 | 173.88538 |
| 1525 | 0.05989  | 0.00432 | 0.01303  | 0.00965 | 1073.77666 | 70.90087 | 0.04929  | 0.00547 | -0.01412 | 0.00856 | 3207.06984 | 173.88538 |
| 1530 | 0.06739  | 0.00432 | 0.01546  | 0.00965 | 1073.77666 | 70.90087 | 0.05909  | 0.00547 | -0.01651 | 0.00856 | 3207.06984 | 173.88538 |
| 1535 | 0.05843  | 0.00432 | 0.02008  | 0.00965 | 1073.77666 | 70.90087 | 0.06176  | 0.00547 | -0.01726 | 0.00856 | 3207.06984 | 173.88538 |
| 1540 | 0.03914  | 0.00432 | 0.00589  | 0.00964 | 1073.77666 | 70.90087 | 0.05942  | 0.00548 | -0.02607 | 0.00856 | 3207.06984 | 173.88538 |
| 1545 | -0.03115 | 0.00432 | 0.01620  | 0.00965 | 1073.77666 | 70.90087 | 0.21276  | 0.00550 | 0.03716  | 0.00856 | 3207.06984 | 173.88538 |
| 1550 | -0.02474 | 0.00432 | 0.01115  | 0.00965 | 1073.77666 | 70.90087 | 0.23982  | 0.00549 | 0.03504  | 0.00856 | 3207.06984 | 173.88538 |
| 1555 | -0.03595 | 0.00432 | -0.00103 | 0.00964 | 1073.77666 | 70.90087 | 0.20979  | 0.00548 | 0.02251  | 0.00856 | 3207.06984 | 173.88538 |
| 1560 | -0.05208 | 0.00432 | -0.01013 | 0.00965 | 1073.77666 | 70.90087 | 0.18718  | 0.00546 | 0.00824  | 0.00856 | 3207.06984 | 173.88538 |
| 1565 | -0.08246 | 0.00432 | -0.00893 | 0.00965 | 1073.77666 | 70.90087 | 0.16875  | 0.00546 | 0.00017  | 0.00856 | 3207.06984 | 173.88538 |
| 1570 | -0.12004 | 0.00432 | -0.00475 | 0.00964 | 1073.77666 | 70.90087 | 0.11367  | 0.00546 | 0.00050  | 0.00856 | 3207.06984 | 173.88538 |
| 1575 | -0.10659 | 0.00432 | 0.01012  | 0.00965 | 1073.77666 | 70.90087 | 0.09670  | 0.00546 | 0.00312  | 0.00856 | 3207.06984 | 173.88538 |
| 1580 | -0.12170 | 0.00432 | 0.02751  | 0.00965 | 1073.77666 | 70.90087 | 0.09300  | 0.00547 | 0.01157  | 0.00856 | 3207.06984 | 173.88538 |
| 1585 | -0.05547 | 0.00432 | 0.02328  | 0.00965 | 1073.77666 | 70.90087 | 0.13344  | 0.00547 | 0.01975  | 0.00856 | 3207.06984 | 173.88538 |
| 1590 | -0.04213 | 0.00432 | 0.00235  | 0.00964 | 1073.77666 | 70.90087 | 0.11429  | 0.00546 | 0.01004  | 0.00856 | 3207.06984 | 173.88538 |
| 1595 | -0.09238 | 0.00432 | -0.01720 | 0.00965 | 1073.77666 | 70.90087 | 0.06667  | 0.00546 | -0.00158 | 0.00856 | 3207.06984 | 173.88538 |
| 1600 | -0.18945 | 0.00432 | -0.03764 | 0.00966 | 1073.77666 | 70.90087 | 0.00523  | 0.00548 | -0.02586 | 0.00856 | 3207.06984 | 173.88538 |
| 1605 | -0.39375 | 0.00434 | -0.05509 | 0.00968 | 1073.77666 | 70.90087 | -0.12530 | 0.00551 | -0.04527 | 0.00857 | 3207.06984 | 173.88538 |
| 1610 | -0.67796 | 0.00435 | -0.06834 | 0.00970 | 1073.77666 | 70.90087 | -0.29033 | 0.00555 | -0.06009 | 0.00858 | 3207.06984 | 173.88538 |
| 1615 | -0.91675 | 0.00437 | -0.08634 | 0.00974 | 1073.77666 | 70.90087 | -0.39626 | 0.00556 | -0.06087 | 0.00858 | 3207.06984 | 173.88538 |
| 1620 | -0.79474 | 0.00434 | -0.05475 | 0.00968 | 1073.77666 | 70.90087 | -0.28951 | 0.00550 | -0.03959 | 0.00857 | 3207.06984 | 173.88538 |
| 1625 | -0.52902 | 0.00432 | -0.03583 | 0.00966 | 1073.77666 | 70.90087 | -0.11096 | 0.00548 | -0.02723 | 0.00856 | 3207.06984 | 173.88538 |

|      |          |         |          |         |            |          |         |         |          |         |            |           |
|------|----------|---------|----------|---------|------------|----------|---------|---------|----------|---------|------------|-----------|
| 1630 | -0.35598 | 0.00432 | -0.03659 | 0.00966 | 1073.77666 | 70.90087 | 0.00510 | 0.00547 | -0.02063 | 0.00856 | 3207.06984 | 173.88538 |
| 1635 | -0.26959 | 0.00433 | -0.04550 | 0.00967 | 1073.77666 | 70.90087 | 0.04109 | 0.00548 | -0.02823 | 0.00856 | 3207.06984 | 173.88538 |
| 1640 | -0.24862 | 0.00433 | -0.05157 | 0.00968 | 1073.77666 | 70.90087 | 0.06377 | 0.00549 | -0.03418 | 0.00856 | 3207.06984 | 173.88538 |
| 1645 | -0.26462 | 0.00434 | -0.06577 | 0.00970 | 1073.77666 | 70.90087 | 0.09222 | 0.00550 | -0.03874 | 0.00856 | 3207.06984 | 173.88538 |
| 1650 | -0.15055 | 0.00433 | -0.04855 | 0.00967 | 1073.77666 | 70.90087 | 0.12724 | 0.00550 | -0.03820 | 0.00856 | 3207.06984 | 173.88538 |
| 1655 | -0.09698 | 0.00433 | -0.04434 | 0.00967 | 1073.77666 | 70.90087 | 0.15965 | 0.00550 | -0.03781 | 0.00856 | 3207.06984 | 173.88538 |

## V. References

1. S. Gunduz, A. C. Goren and T. Ozturk, *Org. Lett.*, 2012, **14**, 1576-1579.
2. F. Neese, F. Wennmohs, U. Becker and C. Riplinger, The ORCA quantum chemistry program package, *J. Chem. Phys.*, 2020, **152**, 224108.
3. C. T. Lee, W. T. Yang and R. G. Parr, *Phys. Rev. B: Condens. Matter Mater. Phys.*, 1988, **37**, 785–789.
4. R. A. Kendall, T. H. Dunning, Jr. and R. J. Harrison, *J. Chem. Phys.*, 1992, **96**, 6796.
5. D. E. Woon and T. H. Dunning, Jr., *J. Chem. Phys.*, 1993, **98**, 1358.
6. F. Weigend, *Phys. Chem. Chem. Phys.*, 2006, **8**, 1057.
7. S.Grimme, J.Antony, S.Ehrlich and H.Krieg, *J. Chem. Phys.*, 2010, **132**, 154104.
8. S.Grimme, S.Ehrlich and L.Goerigk, *J. Comput. Chem.*, 2011, **32**, 1456–1465.
